1 **The *Trypanosoma brucei* Cytoskeletal Protein KHARON**  
2 **Associates with Partner Proteins to Mediate Both**  
3 **Cytokinesis and Trafficking of Flagellar Membrane Proteins**

4  
5 **Marco A. Sanchez, and Scott M. Landfear\***

6  
7 Department of Molecular Microbiology & Immunology, Oregon Health & Science  
8 University, Portland, Oregon, USA

9  
10  
11  
12  
13  
14  
15  
16  
17  
18  
19  
20  
21

\*Author for correspondence ([landfear@ohsu.edu](mailto:landfear@ohsu.edu))

**Summary Statement:** This study investigates the essential role in African trypanosomes of the KHARON protein and its molecular partners in trafficking of membrane proteins to the flagellum.

22 **ABSTRACT**

23 In the African trypanosome *Trypanosoma brucei*, the cytoskeletal protein *TbKHARON* is  
24 required for trafficking of a putative  $\text{Ca}^{2+}$  channel to the flagellar membrane, and it is  
25 essential for parasite viability in both the mammalian stage bloodstream forms and the  
26 tsetse fly procyclic forms. This protein is located at the base of the flagellum, in the  
27 pellicular cytoskeleton, and in the mitotic spindle in both life cycle forms, and it likely  
28 serves multiple functions for these parasites. To begin to deconvolve the functions of  
29 KHARON, we have investigated partners associated with this protein and their roles in  
30 parasite biology. One KHARON associated protein, *TbKHAP1*, is a close interaction  
31 partner that can be crosslinked to KHARON by formaldehyde and pulled down in a  
32 molecular complex, and it colocalizes with *TbKHARON* at the base of the flagellum.  
33 Knockdown of *TbKHAP1* mRNA has similar phenotypes to knockdown of its partner  
34 *TbKHARON*, impairing trafficking of the  $\text{Ca}^{2+}$  channel to the flagellar membrane and  
35 blocking cytokinesis, implying that the *TbKHARON/TbKHAP1* complex mediates  
36 trafficking of flagellar membrane proteins. Two other KHAPs, *TbKHAP2* and *TbKHAP3*,  
37 are in close proximity to *TbKHARON* but may not be direct interaction partners, and  
38 knockdown of their mRNAs does not affect trafficking of the  $\text{Ca}^{2+}$  channel. Two different  
39 flagellar membrane proteins, which are extruded from the flagellar membrane into  
40 extracellular vesicles, are also dependent upon *TbKHARON* for flagellar trafficking.  
41 These studies confirm that *TbKHARON* acts in complexes with other proteins to carry  
42 out various biological functions, and that some partners are involved in the core activity  
43 of targeting membrane proteins to the flagellum.

44

45 **KEYWORDS** *Trypanosoma brucei*, cytoskeleton, cytokinesis, flagellar membrane  
46 protein trafficking, protein complexes, virulence

## 47 INTRODUCTION

48 African trypanosomes of the species *Trypanosoma brucei* are parasitic protists that cause human  
49 African trypanosomiasis and the disease nagana in cattle and are thus of great medical and  
50 veterinary importance (Kennedy, 2013). In addition, these parasites have been recognized as  
51 valuable models for probing fundamental questions in cell and molecular biology (Cayla et al.,  
52 2019). *T. brucei* and related kinetoplastid parasites such as *Trypanosoma cruzi* and *Leishmania*  
53 species are flagellated and offer novel insights into the structure and function of flagella  
54 (Langousis and Hill, 2014) and the roles of these organelles in infection (Kelly et al., 2020a).  
55 Furthermore, the cell division cycle of African trypanosomes has been studied extensively (Farr  
56 and Gull, 2012; Vaughan and Gull, 2008; Wheeler et al., 2019), identifying various processes that  
57 are important for both proliferative and differentiation-linked cell division.

58 In previous work on trafficking of integral membrane proteins to flagella, we identified a  
59 kinetoplastid-specific protein designated KHARON (KH) that plays a critical role in flagellar  
60 targeting of the putative Ca<sup>2+</sup> channel *TbCaCh* (Tb927.10.2880) in *T. brucei*, originally identified  
61 as a flagellar surface protein FS179 (Oberholzer et al., 2011), and the flagellar glucose transporter  
62 *LmxGT1* in *L. mexicana* (Tran et al., 2013) (see Table S1 for tabulation of gene IDs and names  
63 of *T. brucei* proteins investigated in this study). In both species of parasite (Sanchez et al., 2016),  
64 KHARON was localized to three distinct subcellular compartments: the base of the flagellum (Fig.  
65 1A), the subpellicular microtubules that subtend the plasma membrane around the cell body, and  
66 the mitotic spindle (Fig. 1B). Application of RNA interference (RNAi) to knock down *TbKH*  
67 (Tb927.10.8940) revealed that, in addition to preventing flagellar trafficking of *TbCaCh*/FS179,  
68 the flagellum attachment zone (FAZ) was disrupted, resulting in detachment of flagella from the  
69 cell body (Sanchez et al., 2016), leaving this organelle adherent only through its connection at  
70 the flagellar pocket. Interfering with trafficking of *TbCaCh*/FS179 to the flagellar membrane is  
71 likely to induce disruption of flagellar attachment, as RNAi directed against this channel also  
72 results in a similar flagellar detachment phenotype (Oberholzer et al., 2011). In addition, as found  
73 for many genetic alterations that disrupt flagellar attachment, these parasites are unable to initiate  
74 cell division, generating trypanosomes in which nuclei, kinetoplasts (mitochondrial DNA-  
75 containing structures), basal bodies, and flagella have replicated but cytokinesis has not occurred.  
76 This phenotype was apparent in both mammalian bloodstream form (BF) and insect stage  
77 procyclic form (PF) parasites and was thus lethal to both life cycle stages.

78 Similar studies in *L. mexicana* have also established a critical role for *LmxKH* (LmxM.36.5850)  
79 in the life cycle of *Leishmania* parasites. Thus a  $\Delta$ *lmxkh* null mutant was generated in insect stage  
80 promastigotes, where trafficking of *LmxGT1* to the flagellum was strongly impaired (Tran et al.,

81 2013), but cell division and replication of this life cycle stage was not affected. In contrast,  $\Delta lmxkh$   
82 null mutants were unable to undergo cytokinesis after invading host macrophages, resulting in  
83 formation of multinucleate multiflagellated amastigotes that died over the course of several days  
84 (Tran et al., 2013). These null mutants were also avirulent following injection into BALB/c mice  
85 (Tran et al., 2015), and studies by others have shown that *KHARON* null mutants in *L. infantum*  
86 have potential as a live attenuated vaccine (Santi et al., 2018).

87 *KHARON* exhibits both similarities and striking differences between *T. brucei* (*TbKH*) and *L.*  
88 *mexicana* (*LmxKH*). Thus, the two orthologs are relatively divergent in sequence, sharing 27%  
89 amino acid identity and differing significantly in length (411 amino acids for *TbKH* versus 520  
90 amino acids for *LmxKH*). *TbKH* is critical for cell division of both mammalian BF and insect stage  
91 PF parasites, whereas *LmxKH* is only essential for division of disease-causing amastigotes.  
92 Nonetheless, the three subcellular locations for *KHARON* are shared between the two parasites,  
93 as are functions in cytokinesis and formation of the flagellar membrane.

94 *KHARON* proteins do not share significant sequence similarity to proteins outside the  
95 Kinetoplastida, nor do they contain conserved sequence motifs that are suggestive of specific  
96 biochemical or cellular functions. Furthermore, their residence at multiple subcellular locations  
97 suggests that *KHARON* proteins are likely to be multifunctional, participating in flagellar  
98 membrane trafficking, cytokinesis, and spindle function. Additionally, it is possible that distinctions  
99 in function could be conferred by association of *KHARON* with different partner proteins at each  
100 of its three subcellular loci. Thus, we hypothesize that there could exist three distinct *KHARON*  
101 Complexes, Complex 1 at the base of the flagellum, Complex 2 at the subpellicular cytoskeleton,  
102 and Complex 3 at the mitotic spindle. Furthermore, given the apparent differences in *TbKH* and  
103 *LmxKH* noted above, there may be similarities and differences between these putative complexes  
104 between the two species of parasite.

105 To initiate a study of putative *KHARON* Complexes and their functions, we carried out  
106 biotinylation proximity labeling (BioID) (Roux et al., 2012) and tandem affinity purification-mass  
107 spectrometry (TAP-MS) (Kaiser et al., 2008) on *LmxKH*, resulting in the identification of two  
108 *KHARON* Associated Proteins, *LmxKHAP1* and *LmxKHAP2* (*LmxM.32.2440* and *LmxM.05.0380*,  
109 respectively; (Kelly et al., 2020b)). In parallel, we investigated these two *KHARON* partners in *T.*  
110 *brucei* and report the results of those studies here. As anticipated, *TbKHAP1* and *TbKHAP2*  
111 exhibit both similarities and notable differences compared to their orthologs in *L. mexicana*. In  
112 addition, *T. brucei* expresses another *KHARON* partner related to *TbKHAP2* that we designate  
113 *TbKHAP3*. Furthermore, characterization of additional flagellar membrane proteins suggests that  
114 *TbKH* expression is important for flagellar targeting of multiple such proteins in African

115 trypanosomes, whereas the role of *LmxKH* in trafficking of flagellar membrane proteins appears  
116 to be more restricted. These studies confirm that KHARON proteins in both parasites exist in  
117 complexes with various partners and that these partner proteins can play distinct roles in the  
118 functions of different KHARON Complexes.

119

## 120 RESULTS

121 **Localization of *TbKHAP1*, *TbKHAP2*, *TbKHAP3*, and *TbKH* in bloodstream and**  
122 **procyclic African trypanosomes.** To facilitate studies on *TbKH* and its partners, we raised and  
123 affinity purified a polyclonal antibody against this protein, anti-*TbKH* pAb. Western blot analysis  
124 indicated that anti-*TbKH* pAb detects a single protein of ~49 kDa molecular weight, and that an  
125 additional band of ~62 kDa appears in parasites also expressing a BirA\* fusion on the N-terminus  
126 of *TbKH* (Fig. 1 C), establishing that this antibody is of suitable specificity to employ in localization  
127 and biochemical characterization of *TbKH*. To determine whether *TbKHAP1* (Tb927.11.2610),  
128 *TbKHAP2* (Tb927.10.10360) and *TbKHAP3* (Tb927.10.10280) are associated with *TbKH* in a  
129 complex, several complementary approaches were applied. First, each KHAP was tagged at its  
130 N-terminus with the triple hemagglutinin peptide tag HA<sub>3</sub>, and formaldehyde-fixed BF and PF  
131 trypanosomes were examined by immunofluorescence deconvolution microscopy (Fig. 2).  
132 HA<sub>3</sub>::*TbKHAP1* (Fig. 2A,B, green) overlaps with *TbKH* (red) at the cell periphery, as demonstrated  
133 by the yellow color in this region of both BF and PF parasites. In contrast, there was no apparent  
134 overlap of the two signals in the mitotic spindle (central red oval or line marked with a white arrow),  
135 indicating that this protein could be associated with *TbKH* in the subpellicular cytoskeleton but not  
136 at the mitotic spindle. Similarly, *TbKHAP2*::HA<sub>3</sub> (Figs. 2C,D) and V5<sub>3</sub>::*TbKHAP3* or  
137 HA<sub>3</sub>::*TbKHAP3* (Fig. 2E,F) overlap with *TbKH* at the cell periphery but not at the mitotic spindle.  
138 For each of the *TbKHAPs*, there is also green fluorescence that does not coincide with *TbKH* so  
139 that there is not complete overlap of the signals, and there may thus be populations of each  
140 protein that are not associated with each other. However overall, these three *TbKHAPs* are  
141 candidates for *TbKH* partners that are selective for the subpellicular cytoskeleton versus the  
142 mitotic spindle.

143 To determine whether *TbKHAP1*, *TbKHAP2*, or *TbKHAP3* might associate with *TbKH* at the  
144 base of the flagellum, flagella were isolated from parasites expressing each HA<sub>3</sub>- or V5<sub>3</sub>-tagged  
145 *TbKHAP* and imaged by deconvolution microscopy. Fig. 3 shows that HA<sub>3</sub>::*TbKHAP1* (Fig. 3A),  
146 *TbKHAP2*::HA<sub>3</sub> (Fig. 3B) and HA<sub>3</sub>::*TbKHAP3* (Fig. 3C) overlap significantly with *TbKH* in the  
147 region of the flagellum immediately adjacent to the kinetoplast DNA (kDNA, blue, Fig. 3A), which  
148 is close to and physically attached to (Robinson and Gull, 1991) the flagellar basal body. Overall,  
149 these results indicate that *TbKHAP1*, *TbKHAP2*, and *TbKHAP3* could be partners for *TbKH* at  
150 both the pellicular cytoskeleton and the base of the flagellum. It is noteworthy that *TbKHAP3* was  
151 previously identified as a basal body protein in a proteomic study of that subcellular structure  
152 (Dang et al., 2017). Hence, it is likely that *TbKH*, *TbKHAP1*, *TbKHAP2*, and *TbKHAP3* are all  
153 basal body components.

154 **Molecular association of *TbKHAP1*, *TbKHAP2*, and *TbKHAP3* with *TbKH*.** To determine  
155 whether the observed subcellular overlap of the fluorescence signals from *TbKHAPs* and *TbKH*  
156 could indicate physical association in molecular complexes, *TbKH* was endogenously tagged at  
157 its N-terminus with a His<sub>10</sub> affinity tag (His<sub>10</sub>::*TbKH*) to allow pulldown of this protein, and  
158 associated partners, with Co<sup>2+</sup> agarose resin, and this affinity tagged protein was expressed in a  
159 BF cell line also expressing either HA<sub>3</sub>::*TbKHAP1*, *TbKHAP2*::HA<sub>3</sub>, or V5<sub>3</sub>::*TbKHAP3*. Because  
160 *TbKH* is an integral component of the parasite cytoskeleton (Sanchez et al., 2016) and would  
161 pulldown many cytoskeletal proteins in an experiment performed under native conditions, we first  
162 crosslinked with formaldehyde parasites expressing each pair of tagged proteins. Formaldehyde  
163 crosslinks proteins that are in very close proximity (~2-3 Å, reference (Hoffman et al., 2015)), so  
164 this treatment will covalently attach close molecular partners of *TbKH* but not proteins that are  
165 more distant partners in a complex or proteins that are in the cytoskeleton but distant from *TbKH*.  
166 Subsequent treatment with strongly denaturing reagents will dissociate peripheral proteins from  
167 His<sub>10</sub>::*TbKH* while retaining crosslinked partners, and the closely associated partners will thus be  
168 purified along with His<sub>10</sub>::*TbKH*, following binding and elution from Co<sup>2+</sup> resin, and released upon  
169 heat-induced reversal of the crosslinks.

170 Fig. 4A demonstrates that HA<sub>3</sub>::*TbKHAP1* is pulled down with His<sub>10</sub>::*TbKH* when parasites are  
171 formaldehyde crosslinked (EF\*) but not when they are not subjected to crosslinking (EF). As a  
172 negative control, another subpellicular cytoskeletal protein, CAP15 (Vedrenne et al., 2002), was  
173 HA<sub>3</sub> tagged and expressed in His<sub>10</sub>::*TbKH* expressing BF parasites, but this protein was not pulled  
174 down even from formaldehyde-crosslinked parasites. Parallel experiments were performed using  
175 BF parasites expressing *TbKHAP2*::HA<sub>3</sub>, or V5<sub>3</sub>::*TbKHAP3* and His<sub>10</sub>::*TbKH*. Despite extensive  
176 efforts, we have not been able to observe pulldowns of either tagged protein with His<sub>10</sub>::*TbKH*,  
177 raising the possibility that these proteins are not in close enough contact to *TbKH* to crosslink.  
178 These experiments establish that *TbKHAP1* is in very close proximity to *TbKH* and these two  
179 proteins are thus molecular partners.

180 **Proximity ligation assay (PLA) confirms close proximity of *TbKH* with *TbKHAP1*,**  
181 ***TbKHAP2*, and *TbKHAP3*.** To provide another independent examination of whether *TbKH* is in  
182 close physical proximity with each *TbKHAP*, we performed the PLA in parasites expressing  
183 HA<sub>3</sub>::*TbKHAP1*, *TbKHAP2*::HA<sub>3</sub>, and HA<sub>3</sub>::*TbKHAP3*. In this assay (Fredriksson et al., 2002;  
184 Soderberg et al., 2006), cells expressing two partner proteins are first reacted with primary  
185 antibodies from different species. Parasites are subsequently incubated with species-specific  
186 secondary antibodies directed against each primary antibody, and each of these secondary  
187 antibodies contains a unique, covalently attached oligonucleotide. Only if the two target proteins

188 are within ~400 Å of each other, these oligonucleotides can base pair to another linker  
189 oligonucleotide and be covalently ligated into a circular substrate that can participate in rolling  
190 circle DNA amplification of the cognate sequence. The amplified sequence is then hybridized to  
191 a fluorescently labeled DNA probe, resulting in fluorescent puncta within the cell.

192 Fig. 4B,C shows a positive PLA signal (left panels) for BF and PF trypanosomes expressing  
193 HA<sub>3</sub>::*TbKHAP1* and probed with anti-*TbKH* rabbit and anti-HA murine mAb. In contrast, when the  
194 anti-*TbKH* antibody is not employed (right panels), the PLA signal is absent, demonstrating the  
195 dependency of the signal on detection of both closely associated proteins. Similar results confirm  
196 that *TbKH* is in close physical proximity to *TbKHAP2* (Fig. 4D,E) and *TbKHAP3* (Fig. 4F,G).

197 **Predicted properties of *TbKHAP1*, *TbKHAP2*, and *TbKHAP3*.** Bioinformatic analysis of the  
198 50.9 kDa *TbKHAP1* sequence indicates that it is a protein apparently unique to kinetoplastid  
199 protists for which there are orthologs widely distributed among Kinetoplastida. A BLASTP search  
200 (tritypdb.org) revealed several coiled-coil proteins such as neurofilament proteins and  
201 tropomyosin as being significantly, although not closely, related (E values of 2.6e-08 – 5.4e-12).  
202 Prediction of protein disorder using the PrDOS web server (Ishida and Kinoshita, 2007)  
203 (<http://prdos.hgc.jp/cgi-bin/top.cgi>) generated a strong prediction of disorder (probability >0.9)  
204 over the C-terminal region from amino acids 314 – 461. Indeed, this sequence is rich in E  
205 residues, which predispose such regions to intrinsic disorder (Uversky, 2013), and this property  
206 suggests that this region could be involved in protein-protein interactions through induced folding  
207 (Zhang et al., 2013). InterPro (Mitchell et al., 2015)  
208 (<https://www.ebi.ac.uk/interpro/search/sequence/>) predicted coils between amino acids 7 – 31  
209 and 196 – 241 and a disordered region from residue 332 - 461 , and PSIPRED V4.0 (McGuffin et  
210 al., 2000) (<http://bioinf.cs.ucl.ac.uk/psipred/>) predicted the sequence to be largely helix or coil.  
211 Overall, computational analyses suggest that *TbKHAP1* is a coiled-coil protein with an intrinsically  
212 disordered C-terminus, both properties that are consistent with formation of multi-protein  
213 complexes.

214 *TbKHAP2* is the 374 kDa microtubule-associated repetitive protein 1, MARP-1, and *TbKHAP3*  
215 is the 267 kDa MARP-2 that have been studied previously by Seebeck and colleagues (Affolter  
216 et al., 1994; Hemphill et al., 1992; Schneider et al., 1988) and will hereafter be referred to as  
217 *TbKHAP2*/MARP-1 and *TbKHAP3*/MARP-2 to indicate both their association with *TbKH* and their  
218 previously demonstrated roles in microtubule binding. Each sequence contains short unique N-  
219 and C-terminal domains, and the remainder of the sequence consists of 38-amino acid repeats  
220 that are largely conserved within each sequence but ~50% identical between the two proteins.  
221 The unique C-terminal domains (95% identical between the two proteins) bind to microtubules



222 (Affolter et al., 1994), and the proteins decorate the subpellicular cytoskeleton (Schneider et al.,  
223 1988), but their specific biological functions have not been elucidated. In addition, these proteins  
224 have also been localized to the basal body and *TbKHAP3/MARP-2* was designated *TbBBP268*  
225 (Dang et al., 2017).

226 **Phenotypes of BF trypanosomes following knockdown of *TbKHAP1* RNA.** We have  
227 previously demonstrated that knockdown of *TbKH* RNA by inducible RNAi results in a lethal  
228 phenotype on both BF and PF trypanosomes (Sanchez et al., 2016). In these parasites, the  
229 flagellum detaches from the cell body along the flagellum attachment zone (FAZ), and the  
230 parasites are blocked in cytokinesis, resulting in accumulation of multi-nucleated, multi-flagellated  
231 'monster cells' that are not viable in the long term. To assess the roles of *TbKHAP1*,  
232 *TbKHAP2/MARP-1*, and *TbKHAP3/MARP-2* in the biology of BF parasites, we targeted by  
233 RNAi *TbKHAP1* mRNA, using a unique RNAi probe, and *TbKHAP2/TbKHAP3* mRNAs jointly,  
234 using a 500 nt probe covering the conserved C-termini, and assessed the consequent  
235 phenotypes.

236 Induction of RNAi against *TbKHAP1* in BFs using doxycycline resulted in rapid reduction in  
237 the level of this protein (Fig. 5A). Furthermore, RNAi-induced parasites stopped growing almost  
238 immediately and were largely dead by 72 h (Fig. 5B). Quantification via microscopy of the  
239 percentage of cells with different numbers of nuclei and kinetoplasts (Fig. 5C) showed that  
240 following induction of RNAi over 48 h, the percentage of 1N1K parasites dropped dramatically,  
241 while those with multiple nuclei and kinetoplasts (XNYK) increased and began to predominate the  
242 population. In comparison to the normal morphology of pre-induced parasites (Fig. 5D), induction  
243 of RNAi for 20 h (Fig. 5E) or 48 h (Fig. 5F) resulted in parasites with multiple nuclei and/or  
244 kinetoplasts and tadpole-like morphology (white arrowhead) or duplicated flagella located at  
245 opposite poles of the cell body (yellow arrowhead).

246 Notable among cells in RNAi induced populations are those with multiple flagella located at  
247 various relative positions around the cell (e.g., the two parasites in Fig. 5F). Such parasites have  
248 initiated cytokinesis and cleavage furrow formation, as the two duplicated flagella have moved  
249 apart from the initial position they would have following flagellar duplication. However, the  
250 cleavage furrow did not progress to separate the duplicated nuclei and kinetoplasts as it would in  
251 normal cell division. In summary, these observations suggest that loss of *TbKHAP1* protein from  
252 BF parasites results in a block in progression of cleavage furrow rather than an inability to initiate  
253 cleavage furrow ingression.

254 These results are further enhanced by more refined time course studies shown in Fig. S1  
255 following the progression of nuclear content and cell morphologies between 0 – 48 h after

256 induction of RNAi against *TbKHAP1* RNA. At 4 h (Fig. S1B) and 8 h (Fig. S1C) most parasites  
257 had morphologies similar to that preceding induction of RNAi (0 h, Fig. S1A). However, by 12 h  
258 (Fig. S1D), multi-flagellated parasites with ingressation furrows appeared, and by 24 h and 48 h  
259 (Fig. S1E,F), many parasites had incompletely resolved ingressation furrows and multiple nuclei.

260 **Phenotypes of parasites following knockdown of *TbKHAP2/MARP-1* and**  
261 ***TbKHAP3/MARP-2* RNAs.** Induction of RNAi jointly against *TbKHAP2/MARP-1* and  
262 *TbKHAP3/MARP-2* resulted in complete loss of HA<sub>3</sub>::*TbKHAP2/MARP-1* protein by 24 h (Fig.  
263 6A). Depletion of *TbKHAP2/MARP-1* and *TbKHAP3/MARP-2* impaired growth of BF parasites,  
264 resulting in an ~50-fold reduction in parasite number by 120 h (Fig. 6B) post-induction, but growth  
265 inhibition was not nearly as pronounced as it is for *TbKHAP1* RNAi (Fig. 5B). Compared to  
266 uninduced parasites (Fig. 6C), images of parasites following 4 d RNAi (Fig. 6D) still showed many  
267 parasites with normal morphology similar to that of uninduced parasites, but some parasites  
268 rounded up and showed multiple flagella (Fig. 6D, white arrowhead, flagella on opposite sides of  
269 the cell body in DIC image). By 4 d post-RNAi, parasites with 1N2K and XNYK began to  
270 accumulate (Fig. 6E), but the proportion was not nearly as great as for RNAi directed against  
271 *TbKHAP1* (Fig. 5C).

272 ***TbKHAP1*, but not *TbKHAP2/MARP-1* or *TbKHAP3/MARP-2*, is required for targeting**  
273 ***TbCaCh/FS179* to the flagellar membrane.** The observation that *TbKHAP1* is located at the  
274 base of the flagellum (Fig. 3A), likely in the basal body, raises the question of whether it could  
275 play a role in the function of *TbKH* in mediating trafficking of the putative Ca<sup>2+</sup> channel,  
276 *TbCaCh/FS179*, to the flagellar membrane. To test this possibility, we induced RNAi against  
277 *TbKHAP1* RNA in parasites expressing *TbCaCh/FS179*::HA<sub>3</sub> tagged at the C-terminus, which  
278 localized to the flagellar membrane prior to RNAi (Fig. 7A). BF parasites induced for RNAi for 24  
279 h (Fig. 7B) or 48 h (Fig. 7C) exhibited flagella that were devoid of *TbCaCh*::HA<sub>3</sub> (white  
280 arrowheads). These results suggest that a complex of *TbKH/TbKHAP1*, and potentially other  
281 currently unknown partners located at the base of the flagellum, is involved in trafficking this  
282 channel to the flagellar membrane. Since both proteins are also located in the subpellicular  
283 cytoskeleton, it is not possible to definitively ascribe this flagellar trafficking phenotype to the  
284 complex at the base of the flagellum; complexes at both locations will be downregulated by  
285 *TbKHAP1* RNAi. However, integral membrane proteins are first delivered to the flagellar pocket  
286 membrane during biosynthesis (Manna et al., 2014). Hence, the presence of a protein complex  
287 located close to the interface between the flagellar pocket and flagellar membrane, and for which  
288 downregulation of both known partners inhibits trafficking of a protein into the flagellar membrane,  
289 suggests that this complex may mediate trafficking of *TbCaCh/FS179* from the flagellar pocket

290 membrane into the flagellar membrane. Such trafficking would presumably be mediated by a  
291 direct interaction between *TbKH* and the cargo, *TbCaCh/FS179*, and such a molecular interaction  
292 has been demonstrated to occur (Sanchez et al., 2016).

293 In contrast, RNAi directed against *TbKHAP2/MARP-1* and *TbKHAP3/MARP-2* RNAs did  
294 not prevent trafficking of *TbCaCh/FS179::HA<sub>3</sub>* into the flagellar membrane, where it is located  
295 prior to RNAi (Fig. 7D). At both 4 d (Fig. 7E) and 7 d (Fig. 7F) post RNAi, BF parasites with multiple  
296 flagella still trafficked this channel into the flagellar membrane (green arrowheads).

297 ***TbKH*-dependent trafficking of other flagellar membrane proteins.** *TbKH* is required for  
298 trafficking of *TbCaCh/FS179* to the flagellar membrane of BF trypanosomes, and the two protein  
299 interact with each other, as demonstrated by crosslinking pulldown assays (Sanchez et al., 2016).  
300 Is *TbKH* important for flagellar trafficking of other membrane proteins? To address this question,  
301 we monitored the dependency of other flagellar membrane proteins on *TbKH* for targeting to that  
302 organelle. The TrypTag project (<http://tryptag.org/>) has defined the subcellular location of a large  
303 number of trypanosome proteins in PF parasites (Dean et al., 2017), employing live cell  
304 microscopy of parasites expressing mNeonGreen fluorescent protein fusions, and this endeavor  
305 has identified a cohort of flagellar membrane proteins.

306 One such flagellar membrane protein is Tb927.7.4270, a 25 kDa protein predicted to have a  
307 N-terminal signal sequence and a single transmembrane domain (TMD) near its C-terminus. This  
308 protein is one of four paralogous proteins (Tb927.7.4230, 4260, 4270, and 4280) studied  
309 previously by Shimogawa *et al.* (Shimogawa et al., 2015) and designated the Fam79 proteins  
310 (Fam79.1, 79.2, 79.3, and 79.4, respectively). To address potential dependency upon *TbKH* for  
311 flagellar targeting, we monitored the localization of the C-terminal mNG fusion of  
312 Tb927.7.4270/Fam97.3 in both formaldehyde fixed and live PF parasites immobilized in CyGEL  
313 (MacLean et al., 2013). As shown in Fig. 8A (0 h RNAi), this fusion protein is present in flagella  
314 and also in filaments and vesicles that emerge from the flagella, and we designate Tb927.7.4270  
315 as extracellular vesicle membrane protein 1 or *TbEVMP1/Fam79.3*. Multiple investigators have  
316 observed filaments and vesicles emerging from various parts of trypanosomes (Baudieri and  
317 Tomassini, 1962; Ellis et al., 1976; Molloy and Ormerod, 1964; Schepilewsky, 1912; Vickerman  
318 and Luckins, 1969; Wright and Lumsden, 1970), including the flagella, and a recent study by  
319 Szempruch *et al.* (Szempruch et al., 2016a; Szempruch et al., 2016b) has investigated such  
320 structures from BF parasites in detail and concluded that the flagellum-derived nanotubes and  
321 resulting extracellular vesicles (EVs) incorporate a cohort of parasite proteins. Furthermore,  
322 delivery of parasite-derived EVs to host red blood cells or to other trypanosomes can mediate  
323 pathogenic processes, such as erythrocyte clearance and anemia in the mammalian host or

324 delivery of innate immune factors from a resistant to a sensitive strain of trypanosome. Hence,  
325 understanding the process for delivery of parasite proteins to these EVs is of importance for  
326 deciphering mechanisms of parasite virulence. Notably, when PF parasites expressing  
327 *TbEVMP1::mNG* were subjected to RNAi directed against *TbKH* for 24 h, they were strongly  
328 impaired in trafficking of this fusion protein to flagella or nanotubes (Fig. 8A, 24 h RNAi), and  
329 fluorescence often accumulated within the parasite cell body. White arrows indicate flagella that  
330 are devoid of fluorescence and which thus exhibit a trafficking defect. This result indicates that  
331 *TbEVMP1/Fam79.3* is dependent upon *TbKH*, either directly or indirectly, for trafficking to the  
332 flagellum and subsequently for release into EVs. Furthermore, this trafficking defect occurs after  
333 24 h of RNAi directed against *TbKH*, but these PF parasites do not exhibit significant loss of  
334 viability until ~10 days of continuous RNAi (Sanchez et al., 2016), indicating that the effects of  
335 *TbKH* RNAi upon flagellar trafficking are not due to global loss of cellular functions. Notably,  
336 *Fam79.1* (Tb927.7.4230) was also detected by proteomic analysis in EVs of BF trypanosomes by  
337 Szempruch *et al.* (Szempruch et al., 2016b), indicating that multiple members of this family are  
338 delivered to the membranes of EVs during the parasite life cycle.

339 A second flagellar membrane protein localized in TrypTag is Tb927.11.1830, designated here  
340 as *TbEVMP2*. This 62 kDa protein has 6 predicted TMDs and is widely distributed among the  
341 kinetoplastid protists but does not have obvious orthologs outside that order, nor does it possess  
342 conserved Pfam domains (Sonnhammer et al., 1998), except for the TMDs and one predicted  
343 coiled coil. The *TbEVMP2::mNG* fusion protein is also localized to the flagellar membrane,  
344 nanotubes, and extracellular vesicles in PF parasites (Fig. 8B, 0 h RNAi), but induction of RNAi  
345 directed against *TbKH* also inhibits trafficking to these flagellar structures (Fig. 8B, 24 h RNAi),  
346 albeit less strongly than for *TbEVMP1*. Although fluorescence is visible in some flagella after  
347 induction of RNAi (green arrows, righthand image for 24 h RNAi in Fig. 8B), there are some  
348 flagella that exhibit little if any fluorescence (white arrows). We designate this protein *TbEVMP2*  
349 and suggest that it is a second such protein that is dependent upon *TbKH* for efficient trafficking  
350 to the surface of the flagellum.

351 In contrast, the mNG tagged FLA1 binding protein *TbFLA1BP::mNG*, which is in the flagellar  
352 membrane component of the FAZ (Sun et al., 2013), traffics efficiently to the FM both before and  
353 after induction of RNAi (Fig. 8C, 0 h, 24 h, and 48 h RNAi), even in PF parasites that have multiple  
354 flagella. Hence, *TbFLA1BP* does not require *TbKH* for targeting to the FM, implying that there are  
355 both *TbKH*-dependent and *TbKH*-independent FM proteins in this parasite.

356

## 357 **DISCUSSION**

358 In the current study, we have investigated three partners of *TbKH*: *TbKHAP1* and the two  
359 related proteins *TbKHAP2/MARP1* and *TbKHAP3/MARP2*. *TbKHAP1* can be crosslinked to  
360 *TbKH* by formaldehyde indicating that the two proteins associate within 2-3 Å of each other. The  
361 failure to demonstrate crosslinking of *TbKHAP2* or *TbKHAP3* to *TbKH* could be due to their more  
362 distant location from each other, or to technical difficulties associated with these large highly  
363 repetitive proteins, but they are in close enough proximity to give a consistently positive signal  
364 using the PLA, that is within ~400 Å. One possibility is that they are part of a multiprotein complex  
365 but not in immediate contact with each other. The knockdown of *TbKHAP1* RNA has the most  
366 pronounced phenotype, strongly arresting division of BF parasites, inhibiting progression of the  
367 cleavage furrow during cytokinesis, and impairing trafficking of *TbCaCh/FS179* to the FM. Hence,  
368 the phenotypes of RNAi for both *TbKH* and *TbKHAP1* are similar. In contrast, efficient knockdown  
369 of *TbKHAP2/3* RNAs slows growth of BF parasites but has a much less severe effect on cell  
370 division than knockdown of *TbKHAP1* RNA. In addition, trafficking of *TbCaCh/FS179* to the FM  
371 is not impaired, even after 7 days of knockdown in BFs. These results imply that although both  
372 types of protein likely associate with *TbKH* in the cytoskeleton, they play different roles. These  
373 distinctions in functions could either result from separate complexes between *TbKH* and each  
374 partner or from different roles that each partner plays in the same complex. The association of all  
375 partners with the cytoskeleton complicates this issue, as one cannot readily separate different  
376 complexes from each other, as would be possible for cytosolic multi-protein complexes.  
377 Nonetheless, these studies confirm that *TbKH* associates with other partner proteins that mediate  
378 its activities in different ways.

379 One central activity for *TbKH* is to traffic *TbCaCh/FS179* to the FM, a process that is critical  
380 for integrity of the FAZ and for parasite viability. The localization of many PF proteins to their  
381 subcellular sites achieved in the TrypTag.org project (Dean et al., 2017) has identified some  
382 additional FM proteins, along with some others that were identified previously as FM components  
383 from various targeted studies (Kelly et al., 2020a), and one question of relevance is how many of  
384 these flagellar surface components rely upon *TbKH* for organellar trafficking. For *TbCaCh/FS179*,  
385 *TbKH* appears to be directly involved in trafficking, since the two proteins can be crosslinked by  
386 formaldehyde and isolated as molecular partners (Sanchez et al., 2016), but it is possible that  
387 others depend upon *TbKH* either directly or indirectly via the ability of this protein to affect various  
388 cellular processes. In this study, we have shown that two FM proteins, *TbEVMP1/Fam79.3*  
389 (*Tb927.7.4270*) and *TbEVMP2* (*Tb927.11.1830*) are present in both the FM and in EVs secreted  
390 from the FM in PF trypanosomes. Both proteins exhibit dependency upon *TbKH* for trafficking to

391 the FM, as RNAi directed against *TbKH* reduces the efficiency of their localization to this  
392 organelle. In contrast, FLA1BP, which participates in adhesion of the flagellum to the cell body by  
393 binding to the FLA1 protein in the cell body component of the FAZ (Sun et al., 2013), is not  
394 dependent upon *TbKH* to reach the FM, confirming that both *TbKH*-dependent and *TbKH*-  
395 independent FM proteins exist.

396 EVs released from the cell body and FM of BF trypanosomes play important roles in virulence  
397 of African trypanosomes, including lysis of host erythrocytes leading to anemia, a major  
398 mechanism of trypanosome-mediated pathogenesis (Szempruch et al., 2016a; Szempruch et al.,  
399 2016b). One might anticipate that surface components of EVs could play important roles in either  
400 formation of the EV membrane or interaction of EVs with mammalian or tsetse fly tissues.  
401 *TbEVMP1* and *TbEVMP2* mRNAs are both preferentially expressed in PF trypanosomes  
402 (tritrypdb.org), but paralogs of *TbEVMP1*, such as Tb927.7.4230 and Tb927.7.4260, are  
403 expressed at higher levels in BFs compared to PFs, suggesting potential roles for such EVMPs  
404 in both life cycle stages.

405 The *TbKH* partners discovered in this study are associated primarily with the subpellicular  
406 microtubules, but there are likely to be other partners that may reside principally at the base of  
407 the flagellum or in the mitotic spindles and could be associated with distinct activities at those  
408 sites. A BioID study by Zhou *et al.* (Zhou et al., 2018) identified five spindle-associated proteins,  
409 NuSAP1, NuSAP2, Kif13-1, *TbMIP2*, and *TbAUK1*, that are in proximity to *TbKH* and are thus  
410 candidates for molecular partners at the mitotic spindle. In addition, Akiyoshi and Gull (Akiyoshi  
411 and Gull, 2014) identified kinetoplast kinetochore proteins (KKTs) that associate with KHARON  
412 by CoIP/MS experiments, suggesting a possible role of KHARON in faithful chromosome  
413 segregation in kinetoplastid parasites. Molecular interaction studies of the type carried out here  
414 will be required to determine which of these proteins may be *bona fide* molecular partners with  
415 *TbKH* and what roles KHARON complexes may be playing at the spindle. Similarly, the ability to  
416 isolate flagella with associated kinetoplast DNA and basal bodies (Oberholzer et al., 2011;  
417 Robinson and Gull, 1991; Subota et al., 2014) should facilitate identification by either BioID or  
418 TAP-MS of *TbKH* partners at the base of the flagellum. Thus, it should be possible to achieve a  
419 comprehensive understanding of the role of KHARON in the cytoskeleton and the distinct  
420 functions it carries out in association with different partner proteins.

421

## 422 MATERIALS AND METHODS

423 **Growth and transfection of *T. brucei* cell lines.** BF and PF *T. brucei* cell lines were grown  
424 as described previously (Sanchez, 2013). For T7 RNA polymerase-independent expression, the  
425 BF/pHD1313 or PF/pHD1313 clones were employed (Sanchez et al., 2016). For T7 RNA  
426 polymerase driven expression in BF, *T. brucei* 427 parasites transfected with the pSmOx (Poon  
427 et al., 2012) plasmid expressing the tetracycline repressor and T7 RNA polymerase were  
428 generated and grown in 0.1 µg/ml puromycin. For T7 RNA polymerase driven expression in PF,  
429 *T. brucei* 427 13-6 clone expressing TETR and T7 RNA polymerase was used (Wirtz et al., 1999).  
430 Linear plasmid or PCR DNA amplicons were used to transfect mid-log phase parasites as  
431 described (Sanchez et al., 2016). Transfected clones were obtained by limiting dilution according  
432 to published protocols (Burkard et al., 2007; McCulloch et al., 2004).

433 **Primary amino acid sequence analysis.** For DNA and amino acid sequence analysis of  
434 *TbKHAPs*, ExPASy, via the SIB Bioinformatics Resource Portal (<http://expasy.org>), and  
435 GeneBank (<http://blast.ncbi.nlm.nih.gov/Blast.cgi>) or TritypDB (<http://tritypdb.org/tritypdb>) were  
436 used.

437 **Inhibition of gene expression by RNAi.** To inhibit the expression of *TbKH*, *TbKHAPs* or  
438 *TbFLA1*, a number of cell lines were generated employing different genetic backgrounds. The BF  
439 and PF *TbKH*<sup>RNAi</sup> and *TbFLA1*<sup>RNAi</sup> clones, for which expression is T7 polymerase-independent,  
440 were previously described (Sanchez et al., 2016), and RNAi was induced by adding doxycycline  
441 (1 µg/ml) to the culture medium. The BF and PF *TbKHAP1*<sup>RNAi</sup> clones were generated by  
442 subcloning the first 500 bp of the *TbKHAP1* (Tb927.10.1026) ORF into the pZJM RNAi vector,  
443 where expression is driven by two opposing T7 promoters (Wang et al., 2000). Similarly, BF and  
444 PF *TbKHAP2/3*<sup>RNAi</sup> clones were generated by subcloning the last 500 bp of *TbKHAP2*  
445 (Tb927.10.10360) that is almost identical to the *TbKHAP3* (Tb927.10.10280) ORF into the pZJM  
446 RNAi vector. RNAi clones were selected by resistance to 2.5 µg/ml phleomycin and 0.1 µg/ml  
447 puromycin, and expression of dsRNA was induced by addition of 1 µg/ml doxycycline. To verify  
448 inhibition of *TbKHAP1-3* expression, total cell lysates were obtained from parasite cultures  
449 induced for RNAi and subjected to Western blot experiments as indicated below.

450 **Endogenous epitope tagging.** For endogenous tagging of *TbKH*, *TbKHAP1*, *TbKHAP2*,  
451 *TbKHAP3*, CAP-15, *TbCaCh* (FS179), *TbEVMP1*, *TbEVMP2* and *TbFLA1BP* at the N-terminus  
452 or C-terminus, different epitopes were employed as indicated in the text, following the protocol  
453 described (Dean et al., 2015). Briefly, epitope-tagging cassettes were generated by using two  
454 specific 100 nt oligonucleotides containing ~80 nt each that are homologous to the ORF region  
455 to be tagged and ~20 nt homologs to the plasmid pPOTV4 template flanking the drug resistance

456 marker cassette, and using the universal PCR settings. Epitope tagging PCR cassettes were  
457 ethanol precipitated and resuspended in 10  $\mu$ l of nucleofection buffer (Wang et al., 2000), then  
458 parasites were transfected with the purified tagging cassettes as described (Dean et al., 2015)  
459 and selected using 1.5  $\mu$ g/ml G418 (15  $\mu$ g ml<sup>-1</sup> for PF) or 0.1  $\mu$ g/ml puromycin (1  $\mu$ g/ml for PF),  
460 and cloned by limiting dilution.

461 **Generation of Rabbit anti-*TbKH* antibody.** A custom rabbit anti-*TbKH* polyclonal antibody  
462 (pAb) was generated by GenScript, using their 49-day antibody generation protocol. Briefly, two  
463 rabbits were injected with 200  $\mu$ g of His<sub>6</sub>::*TbKH*, representing amino acids 43 - 411, emulsified in  
464 Freund's complete adjuvant. The rabbit was boosted 3 times at 14-day intervals with 200  $\mu$ g of  
465 His<sub>6</sub>::*TbKH* emulsified in Freund's incomplete adjuvant. Antibody specificity for *TbKH* was  
466 evaluated by Western blot comparing the reactivities of the rabbit serum from immunized rabbits  
467 to *T. brucei* protein lysates from wild-type cells and N-BirA\*::*TbKH* cell line (Fig 3A). Proteins were  
468 immunodetected using 1:2500 dilution of the rabbit anti-*TbKH* polyclonal antibody and 1:15,000  
469 dilution of goat anti-rabbit-HRP antibody (Sigma-Aldrich). The chemiluminescent protocol was  
470 used for developing as indicated below.

471 **Immunofluorescence microscopy.** For immunofluorescence microscopy, 5 X 10<sup>6</sup> parasites  
472 were centrifuged at 1000 X g for 5 min and washed twice at room temperature with phosphate  
473 buffered saline pH 7.2 (PBS) containing 10 mM glucose. The cell pellet was resuspended in 4%  
474 paraformaldehyde in PBS, pH 7.2 and incubated for 15 min at room temperature, cells were  
475 centrifuged as described above and washed once with PBS, resuspended in 100  $\mu$ l PBS, spotted  
476 onto poly-L-lysine coated coverslips, and blocked with 2% goat serum, 0.01 sodium azide, 0.01  
477 saponin in PBS (blocking solution) for 1 h at room temperature, rinsed 3 X with PBS, and  
478 incubated with primary antibodies for 1 h at room temperature. The following primary antibodies  
479 were employed: 1:250 dilution rabbit anti-*TbKH* pAb (reported in this work), 1:500 dilution mouse  
480 anti-HA monoclonal antibody (mAb) (BioLegend, Cat # MMS-101R), and 1:1000 dilution mouse  
481 anti- $\alpha$ -tubulin mAb (Sigma-Aldrich, Cat. # T5168). Subsequently, cells were rinsed as before and  
482 incubated with a 1:1000 dilution of secondary antibodies coupled to Alexa Fluor dyes (Molecular  
483 Probes) as follows: Alexa Fluor® 488 goat anti-mouse IgG (H+L) (Cat. # A11001), Alexa Fluor®  
484 594 goat anti-mouse IgG (H+L) (Cat. # A11005), Alexa Fluor® 594 goat anti-rabbit IgG (H+L)  
485 (Cat. # A11012) and Alexa Fluor® 488 goat anti-rabbit IgG (H+L) (Cat. # A11008), as indicated,  
486 in blocking solution for 1h at room temperature in the dark. Cover slips were rinsed 3 X with PBS  
487 and mounted onto slides using DAPI Fluoromount-G (SouthernBiotech). Fluorescence images  
488 were obtained using a wide field deconvolution system (Applied Precision Instruments, Inc.)  
489 consisting of an inverted Nikon TE 200 Eclipse microscope, a Kodak CH350 CCD camera, and



490 the Deltavision operating system. Images were acquired using a 60 X objective and 1.25 X  
491 magnification in a 1024 X 1024 format, and deconvolved using SoftWoRx software. Adobe  
492 Photoshop CC and Adobe Illustrator CC (Adobe Systems Inc.) were used to create image  
493 compositions.

494 **Flagellar protein purification, formaldehyde crosslinking, pull down, and Western blot**  
495 **assay.** Flagellar purification was performed as described (Subota et al., 2014) with slight  
496 changes. Briefly, BF or PF *TbKH1*<sup>RNAi</sup>, *TbFLA1*<sup>RNAi</sup>, *TbKHAP1*<sup>RNAi</sup> and *TbKHAP2/3*<sup>RNAi</sup> clones were  
497 grown in 1 µg/ml doxycycline for the indicated times and pelleted at 420 X g for 10 min. Cell pellets  
498 were washed with buffer A (25 mM Na<sup>+</sup>-tricine, pH 7, 1% BSA, 0.1 mM CaCl<sub>2</sub>, 0.2 mM EDTA, 5  
499 mM MgCl<sub>2</sub> and 12 mM β-mercaptoethanol) containing 0.32 M sucrose and centrifuged at 420 X g  
500 for 10 min. Cell pellets were gently resuspended at 3 X 10<sup>8</sup> parasites/ml in buffer A plus 0.3 M  
501 sucrose, transferred into Eppendorf tubes and vortexed for 5 min or until microscopic verification  
502 of flagellum detachment, followed by centrifugation at 420 X g for 10 min. Supernatants were  
503 recovered and centrifuged at 16,000 X g for 20 min at 4 °C. Pellets containing the isolated flagella  
504 were resuspended in 200 µl of PBS and used for immunofluorescence microscopy. Also,  
505 purification of flagellar cytoskeletons from BF or PF clones was performed by isolation of whole  
506 cytoskeletons followed by treatment with 1 mM CaCl<sub>2</sub> to solubilize the pellicular cytoskeletons,  
507 according to Imhof et al. (Imhof et al., 2019).

508 For formaldehyde crosslinking and pull down, cell lines were prepared that expressed *TbKH1*  
509 endogenously tagged with the His<sub>10</sub> epitope at the N-terminus (His<sub>10</sub>::*TbKH1*) and also co-  
510 expressed with a protein of interest endogenously tagged at its N- or C-terminus with a HA<sub>3</sub> or  
511 V5<sub>3</sub> epitope (HA<sub>3</sub>::*TbKHAP1*, HA<sub>3</sub>::*TbKHAP2*, *TbKHAP2*::HA<sub>3</sub>, V5<sub>3</sub>::*TbKHAP3*, HA<sub>3</sub>::*TbKHAP3*  
512 and *TbCAP15*::HA<sub>3</sub>). Parasites were washed once with PBS and pelleted at 1000 X g for 10 min,  
513 and cell pellets resuspended in 9.37 ml PBS plus 0.63 ml 16% formaldehyde-EM grade  
514 (Polysciences, Inc) and incubated at room temperature for 10 min. For non-crosslinked control  
515 samples, PBS was added instead of formaldehyde. Subsequently, 1 ml of 2.5 M glycine in PBS  
516 was added to the crosslinked samples and incubated at room temperature for 5 min, crosslinked  
517 parasites were pelleted at 1000 X g for 10 min and washed twice with PBS. Then, cell pellets with  
518 or without crosslinking were resuspended in 1 ml of Buffer 1 (8 M urea, 300 mM NaCl, 0.5%  
519 Nonidet P-40, 50 mM NaH<sub>2</sub>PO<sub>4</sub>, 50 mM Tris, pH 7.0) on ice. Samples were sonicated 3 times on  
520 ice at 50% max amplitude (Sonic Dismembrator, 500W, Fisher Scientific) for 10 s with 30 s  
521 between pulses. A 2.5% aliquot of this protein lysate was saved as the protein lysate fraction (LF).

522 The remainder of the protein was incubated with 750 µl of HisPur™ Cobalt Resin (Thermo  
523 Scientific Pierce, Rockford, IL) on a rocker for 45 min at room temperature. The resins were

524 washed 5 times with 1 ml of Buffer 1 (5 min each), 5 times with 1 ml of Buffer 1 at pH 6.4 (5 min  
525 each), and 5 times with 1 ml of Buffer 1 pH 6.4 plus 10 mM imidazole (5 min each). Cobalt bound  
526 protein complexes were eluted with 1 ml of Buffer 2 (45 mM NaH<sub>2</sub>PO<sub>4</sub>, 8 M urea, 270 mM NaCl,  
527 150 mM imidazole). Eluate fractions (EF) were concentrated using Amicon Ultra-0.5 Centrifugal  
528 Filter Units, 10K NMWL (Millipore Sigma). Crosslinking was reversed by boiling protein samples  
529 for 30 min in 1X Bolt™-LDS sample buffer containing 10 mM DTT.

530 Protein extracts were prepared and analyzed by Western blot employing Bolt™ 4-12% Bis-Tris  
531 Mini Protein Gels or NuPage™ 3-8% Tris-acetate gels, Mini Gel Tank and Mini Blot Module  
532 following the manufacturer's instructions (Life Technologies). Proteins were transferred onto  
533 PVDF membranes (Millipore). Protein immunodetection was done using rabbit anti-*Tb*KH pAb at  
534 1:2500 dilution, mouse anti-HA mAb (BioLegend, Cat # MMS-101R) 1:2500 dilution, mouse anti-  
535 V5 mAb (Invitrogen, Cat # MA5-15253) 1:2500 dilution, and mouse anti- $\alpha$  tubulin mAb (Sigma-  
536 Aldrich, Cat. # T5168) 1:10,000 dilution. Goat anti-rabbit-HRP (Sigma-Aldrich) 1:15,000 dilution  
537 and goat anti-mouse-HRP (Jackson ImmunoResearch Laboratories, Cat. # 115-03-174, Lot #  
538 117119) were used as secondary antibodies and Western blots were developed using the  
539 SuperSignal™ West Pico Plus Chemiluminescent Substrate (Thermo Fisher Scientific) and an  
540 Image Quant LAS 400 (GE Healthcare) scanner was employed to acquire luminescent images.  
541 Adobe Photoshop CC and Adobe Illustrator CC (Adobe Systems Inc.) were used to create image  
542 compositions.

543 **Proximity ligation assay (PLA).** Mid-log BF or PF parasites were harvested by  
544 centrifugation at 1000 x g for 10 min, washed once in PBS and fixed with 4% paraformaldehyde  
545 in PBS for 15 min at room temperature. Fixed cells were attached to cover slips and  
546 permeabilized as indicated above for immunofluorescence analysis. Subsequently the PLA  
547 protocol was followed according to the Duolink In Situ Red Starter Kit Mouse/Rabbit (Millipore  
548 Sigma) instructions. Briefly, after blocking cells were incubated with 1:250 dilution of rabbit anti-  
549 *Tb*KH pAb and 1:500 dilution of mouse anti-HA mAb (BioLegend, Cat# MMS-101R). As a  
550 negative control, cells were incubated only with 1:250 dilution of the rabbit anti-*Tb*KH pAb. Then  
551 PLA species-specific secondary antibodies with minus and plus oligonucleotide probes were  
552 added, followed by ligation, amplification and hybridization with specific red-fluorescent  
553 oligonucleotides to allow detection by fluorescence microscopy. Samples were mounted and  
554 imaged as described for immunofluorescence analysis.

555

## 556 **Acknowledgements**

557 We appreciate the expert advice and support of the staff of the Advanced Light Microscopy

558 Core in the Jungers Center for Neurosciences at Oregon Health & Science University. We  
559 acknowledge discussions with Dr. Samuel Dean (University of Oxford) concerning new flagellar  
560 membrane proteins identified by the TrypTag project.

561

#### 562 **Competing interests**

563 The authors declare no competing or financial interests.

564

#### 565 **Author contributions**

566 Conceptualization: M.A.S. and S.M.L.; Data collection: M.A.S.; Data analysis: M.A.S. and  
567 S.M.L.; Writing and editing: M.A.S. and S.M.L.; Funding acquisition and project administration:  
568 S.M.L.

569

#### 570 **Funding**

571 This work was supported by National Institutes of Health grant AI121160 to S.M.L. The content is  
572 solely the responsibility of the authors and does not necessarily represent the official views of the  
573 National Institutes of Health.

574

575 **References**

576 **Affolter, M., Hemphill, A., Roditi, I., Muller, N. and Seebeck, T.** (1994). The repetitive  
577 microtubule-associated proteins MARP-1 and MARP-2 of *Trypanosoma brucei*. *J Struct Biol* **112**,  
578 241-51.

579 **Akiyoshi, B. and Gull, K.** (2014). Discovery of unconventional kinetochores in  
580 kinetoplastids. *Cell* **156**, 1247-1258.

581 **Baudieri, B. and Tomassini, N.** (1962). Fine struttura dei tripanosomi. *Parassitologia* **4**,  
582 89-95.

583 **Burkard, G., Fragoso, C. M. and Roditi, I.** (2007). Highly efficient stable transformation  
584 of bloodstream forms of *Trypanosoma brucei*. *Mol Biochem Parasitol* **153**, 220-3.

585 **Cayla, M., Rojas, F., Silvester, E., Venter, F. and Matthews, K. R.** (2019). African  
586 trypanosomes. *Parasit Vectors* **12**, 190.

587 **Dang, H. Q., Zhou, Q., Rowlett, V. W., Hu, H., Lee, K. J., Margolin, W. and Li, Z.** (2017).  
588 Proximity Interactions among basal body components in *Trypanosoma brucei* identify novel  
589 regulators of basal body biogenesis and inheritance. *mBio* **8**.

590 **Dean, S., Sunter, J., Wheeler, R. J., Hodgkinson, I., Gluenz, E. and Gull, K.** (2015). A  
591 toolkit enabling efficient, scalable and reproducible gene tagging in trypanosomatids. *Open Biol*  
592 **5**, 140197.

593 **Dean, S., Sunter, J. D. and Wheeler, R. J.** (2017). TrypTag.org: A trypanosome genome-  
594 wide protein localisation resource. *Trends Parasitol* **33**, 80-82.

595 **Ellis, D. S., Ormerod, W. E. and Lumsden, W. H. R.** (1976). Filaments of "*Trypanosoma*  
596 *brucei*": some notes on differences in origin and structure in two stains of "*Trypanosoma*  
597 (*Trypanozoon*) *brucei rhodesiense*". *Acta Tropica* **33**, 151-168.

598 **Farr, H. and Gull, K.** (2012). Cytokinesis in trypanosomes. *Cytoskeleton (Hoboken)* **69**,  
599 931-41.

600 **Fredriksson, S., Gullberg, M., Jarvius, J., Olsson, C., Pietras, K., Gustafsdottir, S.**  
601 **M., Ostman, A. and Landegren, U.** (2002). Protein detection using proximity-dependent DNA  
602 ligation assays. *Nat Biotechnol* **20**, 473-7.

603 **Hemphill, A., Affolter, M. and Seebeck, T.** (1992). A novel microtubule-binding motif  
604 identified in a high molecular weight microtubule-associated protein from *Trypanosoma brucei*. *J*  
605 *Cell Biol* **117**, 95-103.

606 **Hoffman, E. A., Frey, B. L., Smith, L. M. and Auble, D. T.** (2015). Formaldehyde  
607 crosslinking: a tool for the study of chromatin complexes. *J Biol Chem* **290**, 26404-11.

608 **Imhof, S., Zhang, J., Wang, H., Bui, K. H., Nguyen, H., Atanasov, I., Hui, W. H., Yang,**  
609 **S. K., Zhou, Z. H. and Hill, K. L.** (2019). Cryo electron tomography with Volta phase plate reveals  
610 novel structural foundations of the 96-nm axonemal repeat in the pathogen *Trypanosoma brucei*.  
611 *Elife* **8**.

612 **Ishida, T. and Kinoshita, K.** (2007). PrDOS: prediction of disordered protein regions from  
613 amino acid sequence. *Nucleic Acids Res* **35**, W460-4.

614 **Kaiser, P., Meierhofer, D., Wang, X. and Huang, L.** (2008). Tandem affinity purification  
615 combined with mass spectrometry to identify components of protein complexes. *Methods Mol Biol*  
616 **439**, 309-26.

617 **Kelly, F. D., Sanchez, M. A. and Landfear, S. M.** (2020a). Touching the surface: Diverse  
618 roles for the flagellar membrane in Kinetoplastid parasites. *Microbiol Mol Biol Rev* **84**, e00079-19.

619 **Kelly, F. D., Tran, K. D., Hatfield, J., Schmidt, K., Sanchez, M. A. and Landfear, S. M.**  
620 (2020b). A cytoskeletal protein complex is essential for division of intracellular amastigotes of  
621 *Leishmania mexicana*. *J Biol Chem* **295**, 13106-13122.

622 **Kennedy, P. G.** (2013). Clinical features, diagnosis, and treatment of human African  
623 trypanosomiasis (sleeping sickness). *Lancet Neurol* **12**, 186-94.

624 **Langousis, G. and Hill, K. L.** (2014). Motility and more: the flagellum of *Trypanosoma*  
625 *brucei*. *Nat Rev Microbiol* **12**, 505-18.

626 **MacLean, L., Myburgh, E., Rodgers, J. and Price, H. P.** (2013). Imaging African  
627 trypanosomes. *Parasite Immunol* **35**, 283-94.

628 **Manna, P. T., Boehm, C., Leung, K. F., Natesan, S. K. and Field, M. C.** (2014). Life and  
629 times: synthesis, trafficking, and evolution of VSG. *Trends Parasitol* **30**, 251-8.

630 **McCulloch, R., Vassella, E., Burton, P., Boshart, M. and Barry, J. D.** (2004).  
631 Transformation of monomorphic and pleomorphic *Trypanosoma brucei*. *Methods Mol Biol* **262**,  
632 53-86.

633 **McGuffin, L. J., Bryson, K. and Jones, D. T.** (2000). The PSIPRED protein structure  
634 prediction server. *Bioinformatics* **16**, 404-5.

635 **Mitchell, A., Chang, H. Y., Daugherty, L., Fraser, M., Hunter, S., Lopez, R., McAnulla,**  
636 **C., McMenamin, C., Nuka, G., Pesseat, S. et al.** (2015). The InterPro protein families database:  
637 the classification resource after 15 years. *Nucleic Acids Res* **43**, D213-21.

638 **Molloy, J. O. and Ormerod, W. E.** (1964). A fibril emerging from the posterior end of  
639 *Trypanosoma rhodesiense*. *Philos Trans R Soc Lond B Biol Sci* **58**, 2.

640 **Oberholzer, M., Langousis, G., Nguyen, H. T., Saada, E. A., Shimogawa, M. M.,**  
641 **Jonsson, Z. O., Nguyen, S. M., Wohlschlegel, J. A. and Hill, K. L.** (2011). Independent analysis

642 of the flagellum surface and matrix proteomes provides insight into flagellum signaling in  
643 mammalian-infectious *Trypanosoma brucei*. *Mol Cell Proteomics* **10**, M111 010538.

644 **Poon, S. K., Peacock, L., Gibson, W., Gull, K. and Kelly, S.** (2012). A modular and  
645 optimized single marker system for generating *Trypanosoma brucei* cell lines expressing T7 RNA  
646 polymerase and the tetracycline repressor. *Open Biol* **2**, 110037.

647 **Robinson, D. R. and Gull, K.** (1991). Basal body movements as a mechanism for  
648 mitochondrial genome segregation in the trypanosome cell cycle. *Nature* **352**, 731-3.

649 **Roux, K. J., Kim, D. I., Raida, M. and Burke, B.** (2012). A promiscuous biotin ligase  
650 fusion protein identifies proximal and interacting proteins in mammalian cells. *J Cell Biol* **196**, 801-  
651 10.

652 **Sanchez, M. A.** (2013). Molecular identification and characterization of an essential  
653 pyruvate transporter from *Trypanosoma brucei*. *J Biol Chem* **288**, 14428-37.

654 **Sanchez, M. A., Tran, K. D., Valli, J., Hobbs, S., Johnson, E., Gluenz, E. and Landfear,  
655 S. M.** (2016). KHARON Is an essential cytoskeletal protein involved in the trafficking of flagellar  
656 membrane proteins and cell division in African trypanosomes. *J Biol Chem* **291**, 19760-73.

657 **Santi, A. M. M., Lanza, J. S., Tunes, L. G., Fiuza, J. A., Roy, G., Orfano, A. D. S., de  
658 Carvalho, A. T., Frezard, F., Barros, A. L. B., Murta, S. M. F. et al.** (2018). Growth arrested  
659 live-attenuated *Leishmania infantum* KHARON1 null mutants display cytokinesis defect and  
660 protective immunity in mice. *Sci Rep* **8**, 11627.

661 **Schepilewsky, E.** (1912). Fadenförmige anhängsel bei den trypanosomen. *Zbl. Bakt.* **65**,  
662 79-83.

663 **Schneider, A., Hemphill, A., Wyler, T. and Seebeck, T.** (1988). Large microtubule-  
664 associated protein of *T. brucei* has tandemly repeated, near-identical sequences. *Science* **241**,  
665 459-62.

666 **Shimogawa, M. M., Saada, E. A., Vashisht, A. A., Barshop, W. D., Wohlschlegel, J.  
667 A. and Hill, K. L.** (2015). Cell surface proteomics provides insight into stage-specific remodeling  
668 of the host-parasite interface in *Trypanosoma brucei*. *Mol Cell Proteomics* **14**, 1977-88.

669 **Soderberg, O., Gullberg, M., Jarvius, M., Ridderstrale, K., Leuchowius, K. J., Jarvius,  
670 J., Wester, K., Hydbring, P., Bahram, F., Larsson, L. G. et al.** (2006). Direct observation of  
671 individual endogenous protein complexes *in situ* by proximity ligation. *Nat Methods* **3**, 995-1000.

672 **Sonnhammer, E. L., Eddy, S. R., Birney, E., Bateman, A. and Durbin, R.** (1998). Pfam:  
673 multiple sequence alignments and HMM-profiles of protein domains. *Nucleic Acids Res* **26**, 320-  
674 2.

675           **Subota, I., Julkowska, D., Vincensini, L., Reeg, N., Buisson, J., Blisnick, T., Huet, D.,**  
676 **Perrot, S., Santi-Rocca, J., Duchateau, M. et al.** (2014). Proteomic analysis of intact flagella of  
677 procyclic *Trypanosoma brucei* cells identifies novel flagellar proteins with unique sub-localization  
678 and dynamics. *Mol Cell Proteomics* **13**, 1769-86.

679           **Sun, S. Y., Wang, C., Yuan, Y. A. and He, C. Y.** (2013). An intracellular membrane  
680 junction consisting of flagellum adhesion glycoproteins links flagellum biogenesis to cell  
681 morphogenesis in *Trypanosoma brucei*. *J Cell Sci* **126**, 520-31.

682           **Szempruch, A. J., Dennison, L., Kieft, R., Harrington, J. M. and Hajduk, S. L.** (2016a).  
683 Sending a message: extracellular vesicles of pathogenic protozoan parasites. *Nat Rev Microbiol*  
684 **14**, 669-675.

685           **Szempruch, A. J., Sykes, S. E., Kieft, R., Dennison, L., Becker, A. C., Gartrell, A.,**  
686 **Martin, W. J., Nakayasu, E. S., Almeida, I. C., Hajduk, S. L. et al.** (2016b). Extracellular vesicles  
687 from *Trypanosoma brucei* mediate virulence factor transfer and cause host anemia. *Cell* **164**,  
688 246-257.

689           **Tran, K. D., Rodriguez-Contreras, D., Vieira, D. P., Yates, P. A., David, L., Beatty, W.,**  
690 **Elferich, J. and Landfear, S. M.** (2013). KHARON1 mediates flagellar targeting of a glucose  
691 transporter in *Leishmania mexicana* and is critical for viability of infectious intracellular  
692 amastigotes. *J. Biol. Chem.* **288**, 22721-22733.

693           **Tran, K. D., Vieira, D. P., Sanchez, M. A., Valli, J., Gluenz, E. and Landfear, S. M.**  
694 (2015). *Kharon1* null mutants of *Leishmania mexicana* are avirulent in mice and exhibit a  
695 cytokinesis defect within macrophages. *PLoS One* **10**, e0134432.

696           **Uversky, V. N.** (2013). The alphabet of intrinsic disorder: II. Various roles of glutamic acid  
697 in ordered and intrinsically disordered proteins. *Intrinsically Disord Proteins* **1**, e24684.

698           **Vaughan, S. and Gull, K.** (2008). The structural mechanics of cell division in  
699 *Trypanosoma brucei*. *Biochem Soc Trans* **36**, 421-4.

700           **Vedrenne, C., Giroud, C., Robinson, D. R., Besteiro, S., Bosc, C., Bringaud, F. and**  
701 **Baltz, T.** (2002). Two related subpellicular cytoskeleton-associated proteins in *Trypanosoma*  
702 *brucei* stabilize microtubules. *Mol Biol Cell* **13**, 1058-70.

703           **Vickerman, K. and Luckins, A. G.** (1969). Localization of variable antigens in the surface  
704 coat of *Trypanosoma brucei* using ferritin conjugated antibody. *Nature* **224**, 1125-1126.

705           **Wang, Z., Morris, J. C., Drew, M. E. and Englund, P. T.** (2000). Inhibition of  
706 *Trypanosoma brucei* gene expression by RNA interference using an integratable vector with  
707 opposing T7 promoters. *J Biol Chem* **275**, 40174-9.

708           **Wheeler, R. J., Gull, K. and Sunter, J. D.** (2019). Coordination of the Cell Cycle in  
709 Trypanosomes. *Annu Rev Microbiol* **73**, 133-154.

710           **Wirtz, E., Leal, S., Ochatt, C. and Cross, G. A. M.** (1999). A tightly regulated inducible  
711 expression system for conditional gene knock-outs and dominant-negative genetics in  
712 *Trypanosoma brucei*. *Mol. Biochem. Parasitol.* **99**, 89-101.

713           **Wright, K. A. and Lumsden, W. H. R.** (1970). The formation of filopodium-like processes  
714 by *Trypanosoma*. *J. Cell Sci.* **6**, 285-297.

715           **Zhang, T., Faraggi, E., Li, Z. and Zhou, Y.** (2013). Intrinsically semi-disordered state and  
716 its role in induced folding and protein aggregation. *Cell Biochem Biophys* **67**, 1193-205.

717           **Zhou, Q., Lee, K. J., Kurasawa, Y., Hu, H., An, T. and Li, Z.** (2018). Faithful chromosome  
718 segregation in *Trypanosoma brucei* requires a cohort of divergent spindle-associated proteins  
719 with distinct functions. *Nucleic Acids Res* **46**, 8216-8231.

720

721



## 722 **FIGURE LEGENDS**

723 **Fig. 1. *TbKH* localizes in three distinct subcellular compartments.** (A) Flagellar preparation  
724 from *TbFLA1*<sup>RNAi</sup> cell line, isolated after 72 h of induction with 1 µg/ml doxycycline (dox), stained  
725 with DAPI (*blue*) and immunostained with anti-*TbKH* pAb (*TbKH*, *red*). *TbKH* localization at the  
726 base of the flagellum is indicated by the *red arrowhead*. (B) Wild type BF parasites were  
727 immunostained with anti-*TbKH* pAb (*TbKH*, *red*) and stained with DAPI. These images display a  
728 parasite in which *TbKH* staining is associated with both the subpellicular microtubules (*right*  
729 *arrowheads*) and the mitotic spindle that connects the two nuclei late during mitosis (*left*  
730 *arrowheads*). DIC indicates images collected by differential interference contrast microscopy.  
731 (C) Western blot of total protein lysates from BF trypanosomes that are either wild type (*WT*) or  
732 expressing BirA\*::*TbKH* fusion protein (*A\**). Blot was probed with anti-*TbKH* pAb and developed  
733 by chemiluminescence. Specific immunodetected proteins corresponding to the native *TbKH*  
734 and the BirA\*::*TbKH* fusion protein are shown. Relative protein molecular weights are shown in  
735 kDa, as determined by mobility relative to molecular weight markers.

736 **Fig. 2. Subcellular localization of *TbKHAPs* in BF and PF *T. brucei*.** (A, B) The HA<sub>3</sub>::*TbKHAP1*  
737 cell line was immunostained with anti-HA mAb (HA<sub>3</sub>::*TbKHAP1*, *green*) and anti-*TbKH* pAb  
738 (*TbKH*, *red*). (C, D) The *TbKHAP2*::HA<sub>3</sub> cell line was stained with anti-HA mAb (*TbKHAP2*::HA<sub>3</sub>,  
739 *green*) and anti-*TbKH* pAb (*TbKH*, *red*). (E) The BF 3V5::*TbKHAP3* and (F) PF HA<sub>3</sub>::*TbKHAP3*  
740 cell lines were immunostained with (E) anti-V5 mAb (3V5::*TbKHAP3*, *green*) or (F) anti-HA mAb  
741 (HA<sub>3</sub>::*TbKHAP3*, *green*) and anti-*TbKH* pAb (*TbKH*, *red*). All preparations were stained with DAPI,  
742 which detects both nuclear and kinetoplast DNA (*blue*). DIC images were also acquired from all  
743 samples.

744 **Fig. 3. KHARON and KHAPs colocalize at the base of the flagellum in *T. brucei*.** (A) Whole  
745 isolated flagella from the BF HA<sub>3</sub>::*TbKHAP1*/*TbFLA1*<sup>RNAi</sup> clone induced for RNAi for 72 h, were  
746 immunostained with anti-HA mAb (HA<sub>3</sub>::*TbKHAP1*, *green*) and anti-*TbKH* pAb (*TbKH*, *red*) and  
747 stained with DAPI (*blue*). (A, left panel) shows an immunofluorescence/DIC image of an isolated  
748 flagellum, *black punctuated* box indicates the magnified area depicted in (A, center-right, center-  
749 left and left) panels. *Green arrowheads* indicate HA<sub>3</sub>::*TbKHAP1* localization, *red arrowheads*  
750 indicate *TbKH* localization and *yellow arrowheads* indicate overlapping signals, when channels  
751 are merged, near the kinetoplast (*blue*). (B) Flagellar cytoskeletons were isolated from BF  
752 trypanosomes expressing HA<sub>3</sub>::*TbKHAP2* and imaged as described in (A). (C) Flagellar  
753 cytoskeletons were isolated from PF trypanosomes expressing HA<sub>3</sub>::*TbKHAP3* and imaged as  
754 described in (A).

755 **Fig. 4. *TbKH* is closely associated with *TbKHAP1*, *TbKHAP2*, and *TbKHAP3*.** (A) Western  
756 blot of protein samples from pull down of HA<sub>3</sub>::*TbKHAP1* using His<sub>10</sub>::*TbKH* as a bait and  
757 CAP15::HA<sub>3</sub> as negative control. *LS* and *EF*, lysate and elution fractions without formaldehyde  
758 crosslinking; *LS\** and *EF\**, lysate and elution fraction with formaldehyde crosslinking. Protein blots  
759 were developed by chemiluminescence, bands are indicated by protein names, and migration of  
760 molecular weight markers are designated in kDa. (B, C) PLA employing BF or PF  
761 HA<sub>3</sub>::*TbKHAP1*/His<sub>10</sub>::*TbKH* cell lines, as indicated. For these and all subsequent sections of this  
762 figure, the *left panel* shows results using both anti-HA mAb and anti-*TbKH* pAb, and the *right*  
763 *panel* shows results using only the anti-*TbKH* pAb, as the negative control. *Red puncta* indicate  
764 positive HA<sub>3</sub>::*TbKHAP1*-*TbKH* interaction. DIC images were acquired from all samples.

765 (D, E) PLA employing BF or PF *TbKHAP2*::HA<sub>3</sub> cell lines, as indicated. *Red puncta* indicate  
766 positive *TbKHAP2*-*TbKH* interaction. (F, G) PLA employing BF or PF HA<sub>3</sub>::*TbKHAP3* cell lines,  
767 as indicated using. *Red puncta* indicate positive *TbKHAP3*-*TbKH* interaction.

768 **Figure 5. Depletion of *TbKHAP1* is lethal for *T. brucei* parasites.** (A) Western blot of total  
769 protein lysates from *TbKHAP1*<sup>RNAi</sup> BF parasites grown in the presence of doxycycline (+dox)  
770 and immunodetected with anti-HA mAb, anti-*TbKH* pAb. The approximate molecular weights in  
771 kDa of HA<sub>3</sub>::*TbKHAP1* and *TbKH* are indicated as determined by mobility compared to weight  
772 markers. *Numbers* under the blot represent the relative intensity (*RI*) of HA<sub>3</sub>::*TbKHAP1* protein  
773 normalized to the *TbKH* protein level. (B) Cell density for induced (*empty circles*) and non-  
774 induced (*filled circles*) *TbKHAP1*<sup>RNAi</sup> BF cell lines. Parasite density was quantified by phase  
775 contrast microscopy using a hemocytometer. Data represent the averages and standard  
776 deviations of two experiments, each employing an independently isolated *TbKHAP1*<sup>RNAi</sup> clonal  
777 cell line, and technical replicates were also performed for each biological replicate. Standard  
778 deviations are too small to be visible. (C) Microscopic analysis of nuclei and kinetoplast  
779 numbers of BF *TbKHAP1*<sup>RNAi</sup> parasites following induction of RNAi. Data represent frequency  
780 (%) of cells with different numbers of DAPI stained nuclei (*N*) and kinetoplasts (*K*). Results  
781 represent the average and range of two independent experiments. Brackets compare 0 h to 48  
782 h doxycycline induction, with \*\*\* representing P<0.001, as determined by 2-way ANOVA using  
783 Dunnett's multiple comparison test, where all time points were compared to 0 h doxycycline but  
784 only statistical significance for 48 h is shown. (D-F) *TbKHAP1*<sup>RNAi</sup> BF parasites were stained  
785 with DAPI (*blue*) and immunostained with anti- $\alpha$ -tubulin mAb (*Tub*, *red*) at (D) 0 h, (E) 20 h and  
786 (F) 48 h post-RNAi induction. In (E) the *white arrowhead* indicates a cell with a tadpole-like  
787 morphology and the *yellow arrowhead* indicates a cell with two flagella at opposite poles of the  
788 cell body.

789 **Fig. 6. Phenotypes resulting from RNAi directed against *TbKHAP2* and *TbKHAP3*.** (A)  
790 Western blot of total protein lysates of BF parasites expressing HA<sub>3</sub>::*TbKHAP2* following  
791 induction of RNAi (1 µg ml<sup>-1</sup> doxycycline, *dox*) directed against *TbKHAP2/3* RNAs. Protein blots  
792 were probed with anti-HA mAb and anti-*TbKH* pAb as loading control. Molecular weight markers  
793 are indicated in kDa. (B) Growth curve of induced (*empty circles*) and non-induced (*filled circles*)  
794 *TbKHAP2/3*<sup>RNAi</sup> cell line. Parasite density was quantified by phase contrast microscopy using a  
795 hemocytometer. The data represent two biological replicate experiments, but the standard  
796 deviations are too small to see in the figure. Representative *TbKHAP2/3*<sup>RNAi</sup> cells induced for  
797 RNAi were stained with DAPI (*blue*) and immunostained with anti-*TbKH* pAb (*TbKH*, *red*) at (C)  
798 0 h and (D) 4 days post-RNAi induction. *White arrowhead* in (D) indicates a cell showing  
799 aberrant morphology. DIC images were obtained for all samples. (E) Microscopic analysis of NK  
800 in BF parasites induced for RNAi. Frequency (%) of cells with different numbers of nuclei (*N*)  
801 and kinetoplasts (*K*) at different times following induction of RNAi against *TbKHAP2/3* mRNA.  
802 Results represent the average and range of two independent experiments. Statistical  
803 comparisons were performed as in Fig. 5C, with \*\*\* representing P<0.001, \*\* P<0.01, and \*  
804 P<0.05.

805 **Fig. 7. Knockdown of *TbKHAP1*, but not *TbKHAP2* or *TbKHAP3*, impairs trafficking of**  
806 ***TbCaCh::HA<sub>3</sub>* to the flagellum.** (A-C) *TbCaCh::HA<sub>3</sub>/TbKHAP1*<sup>RNAi</sup> BF cell line was induced with  
807 1 µg/ml doxycycline (*dox*). Parasites were stained with DAPI (*blue*) and immunostained with  
808 anti-HA mAb (*TbCaCh::HA<sub>3</sub>*, *green*) and anti-*TbKH* pAb (*TbKH*, *red*). (A) Non-induced  
809 *TbCaCh::HA<sub>3</sub>/TbKHAP1*<sup>RNAi</sup> parasites (0 h *dox*), (B) parasites induced for 24 h (24 h *dox*) and  
810 (C) parasites induced for 48 h (48 h *dox*). *Green arrowheads* in (A-C) indicate flagella where  
811 *TbCaCh::HA<sub>3</sub>* is present, and *white arrowheads* in (B-C) indicate flagella where *TbCaCh::HA<sub>3</sub>*  
812 is absent. (D-F) *TbCaCh::mNG/TbKHAP2/3*<sup>RNAi</sup> BF cell line was induced with 1 µg/ml doxycycline  
813 (*dox*). Parasites were stained with DAPI (*blue*) and anti-*TbKH* pAb (*TbKH*, *red*), and mNG  
814 endogenous fluorescence was also acquired (*TbCaCh::mNG*, *green*). Parasites were induced  
815 with doxycycline for (D) 0 days (0 d *dox*), (E) 4 days (4d *dox*), or (F) 7 days (7d *dox*). *Green*  
816 *arrowheads* indicate flagella where *TbCaCh::mNG* is present. Merged DIC images are  
817 presented in the right panel of each image pair. The scale bar shown in (A) applies to all  
818 images.

819 **Fig. 8. Trafficking of *TbEVMP1*, *TbEVMP2*, and *TbFLA1BP* in *TbKH*<sup>RNAi</sup> BF parasites.** (A)  
820 Parasites expressing *TbEVMP1::mNG* before (0 h RNAi) and after (24 h RNAi) induction of RNAi  
821 against *TbKH* mRNA. *Green arrowheads* indicate mNG fluorescence in the FM (all panels) or in  
822 extracellular vesicles (0 h RNAi, right panel). *White arrowheads* indicate flagella without mNG

823 fluorescence. (B) Parasites expressing *TbEVMP2::mNG* before (*0 h RNAi*) and after (*24 h*  
824 *RNAi*) induction of RNAi against *TbKH* mRNA. (C) Parasites expressing *TbFLA1BP::mNG*  
825 before (*0 h RNAi*) and after (*24 h RNAi, 48 h RNAi*) induction of RNAi against *TbKH* mRNA. The  
826 left-most images in A, B, and C represent formaldehyde fixed parasites, whereas for the other  
827 images, live parasites were suspended in CyGel, which facilitates visualization of secreted  
828 extracellular vesicles.  
829

Figure 1

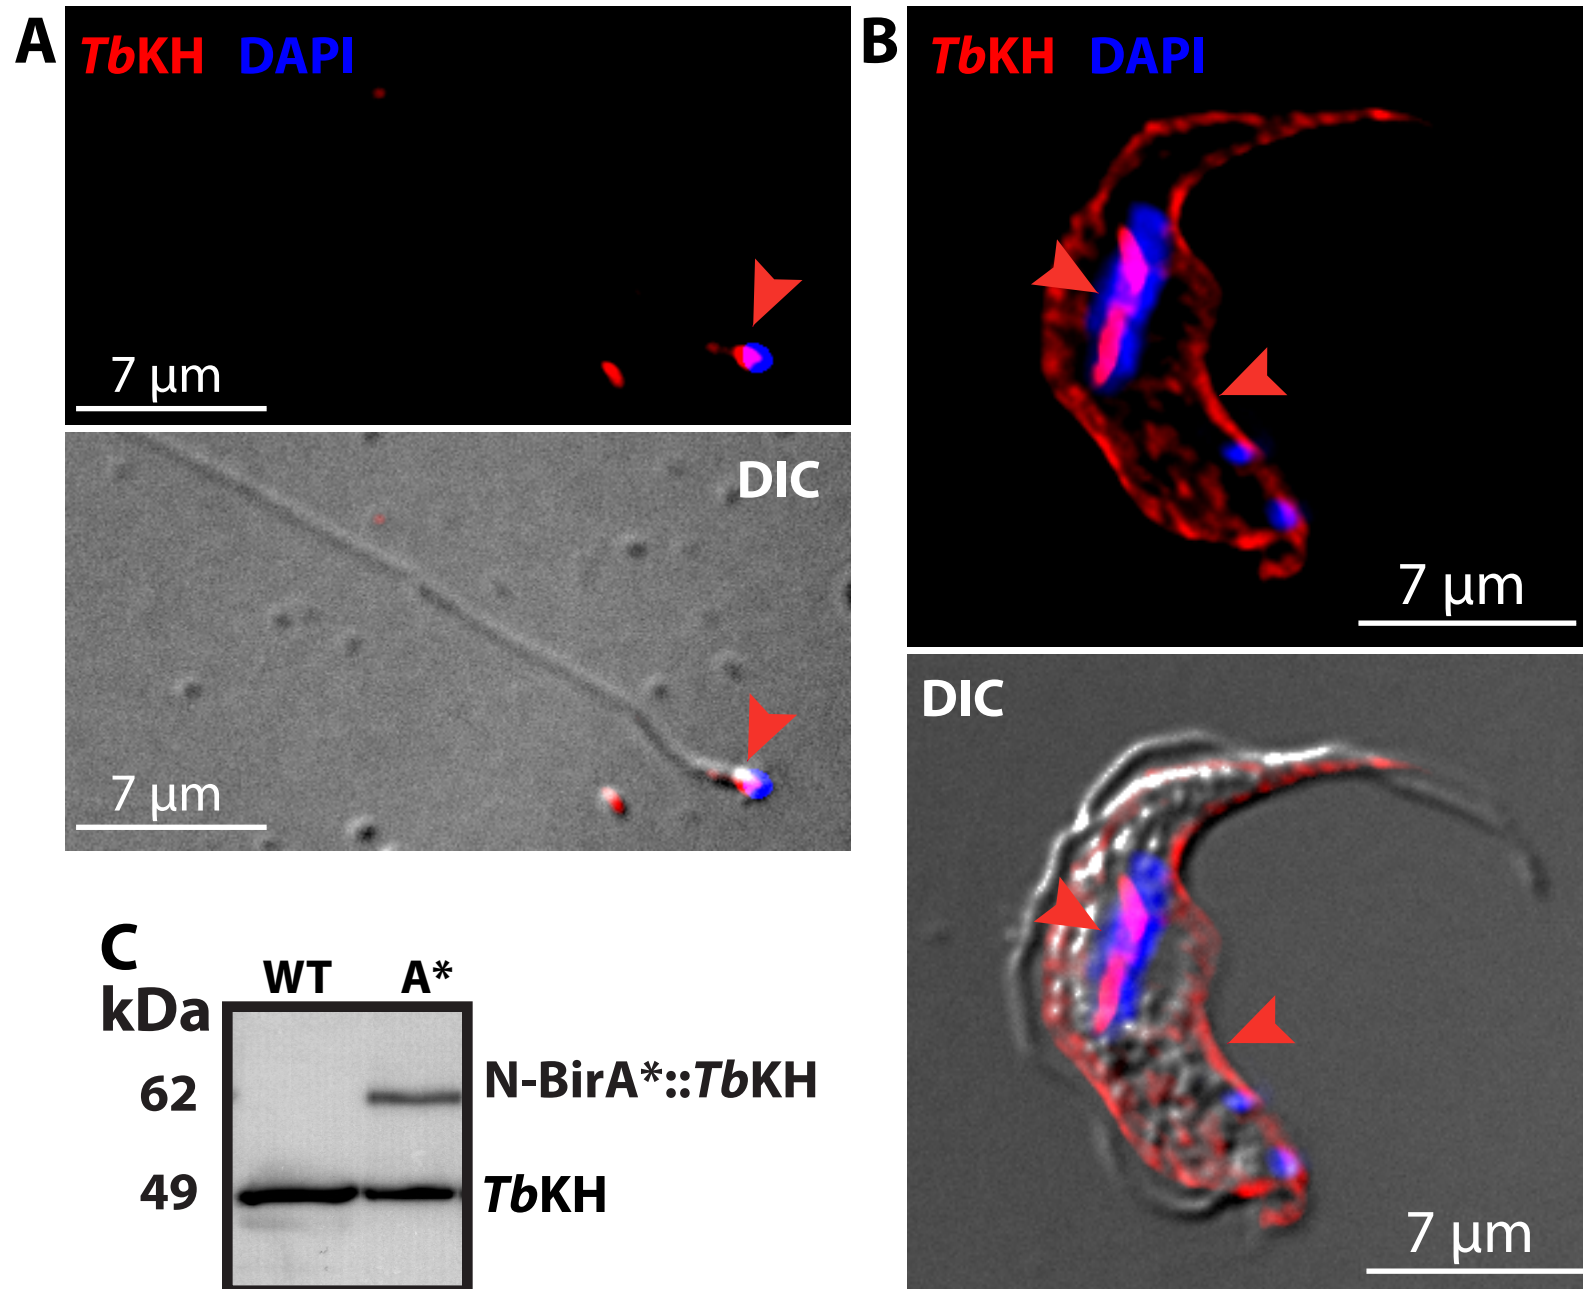

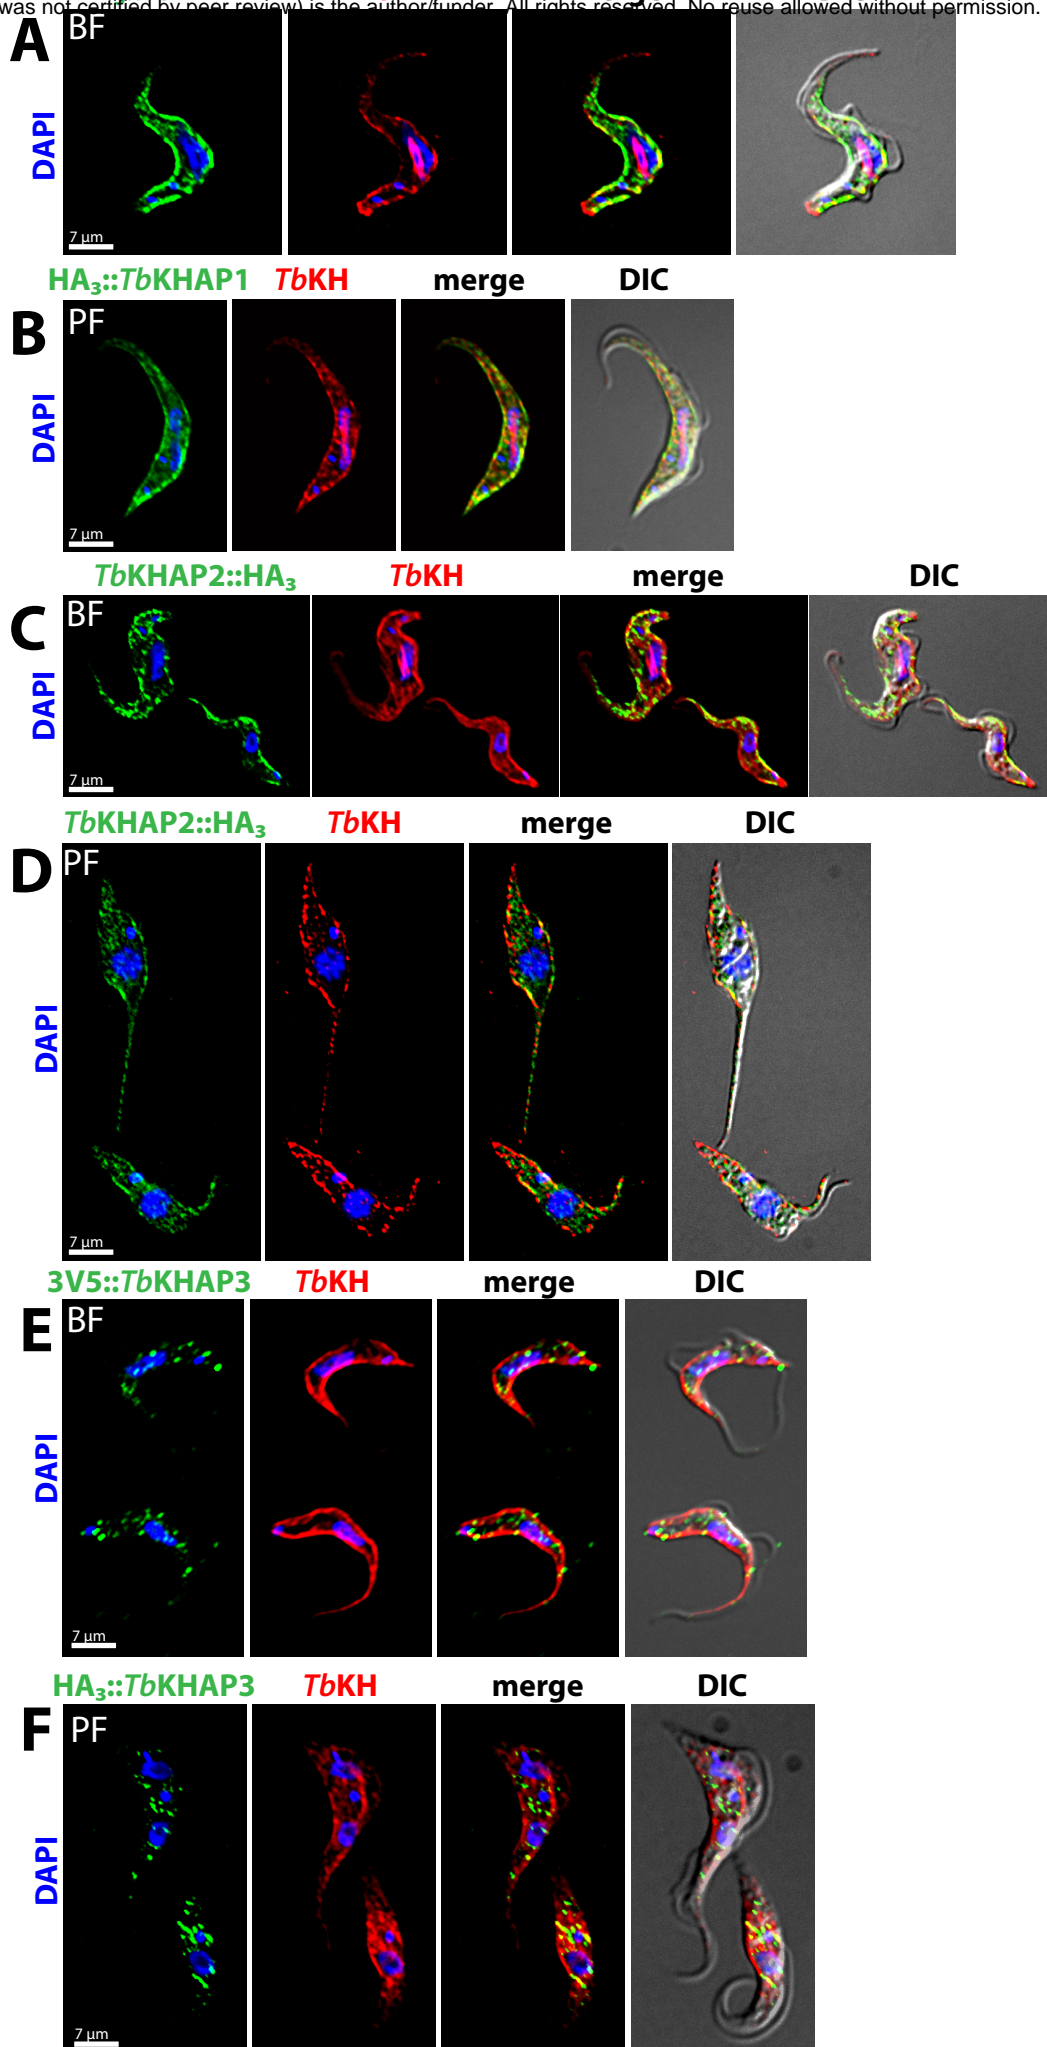

Figure 3

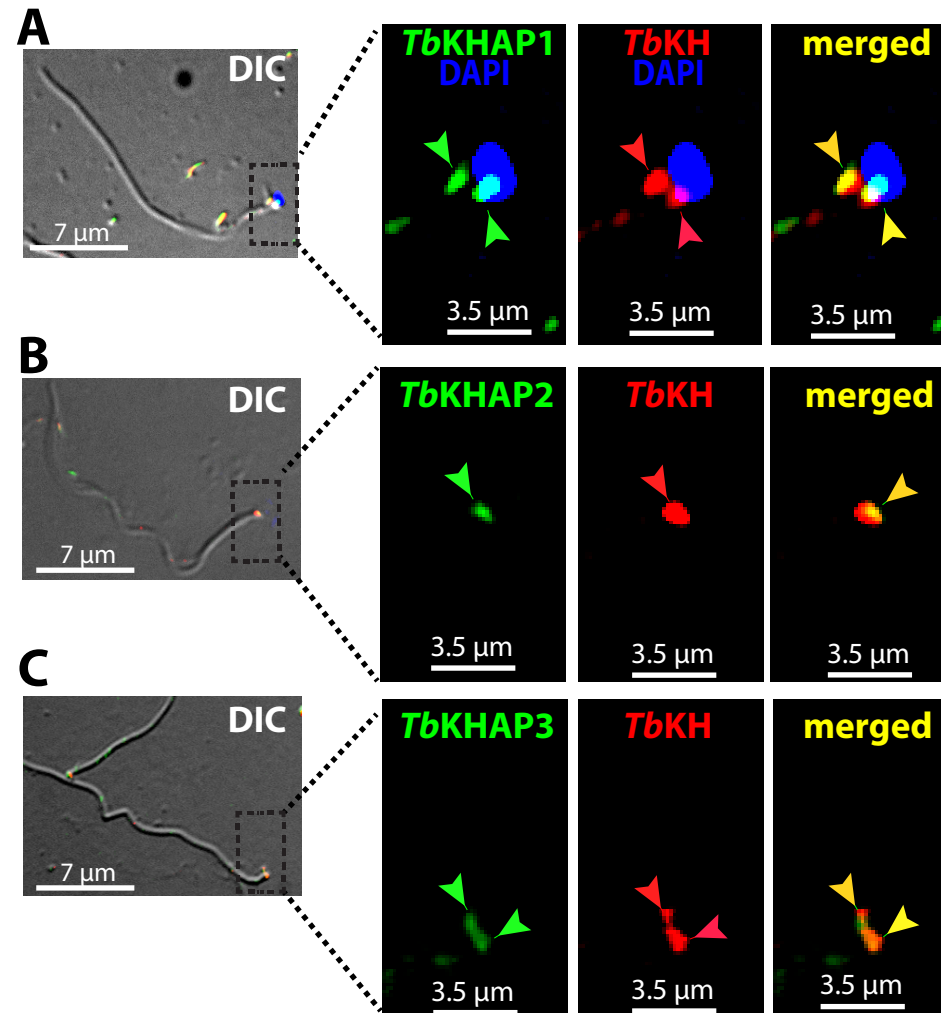

Figure 4

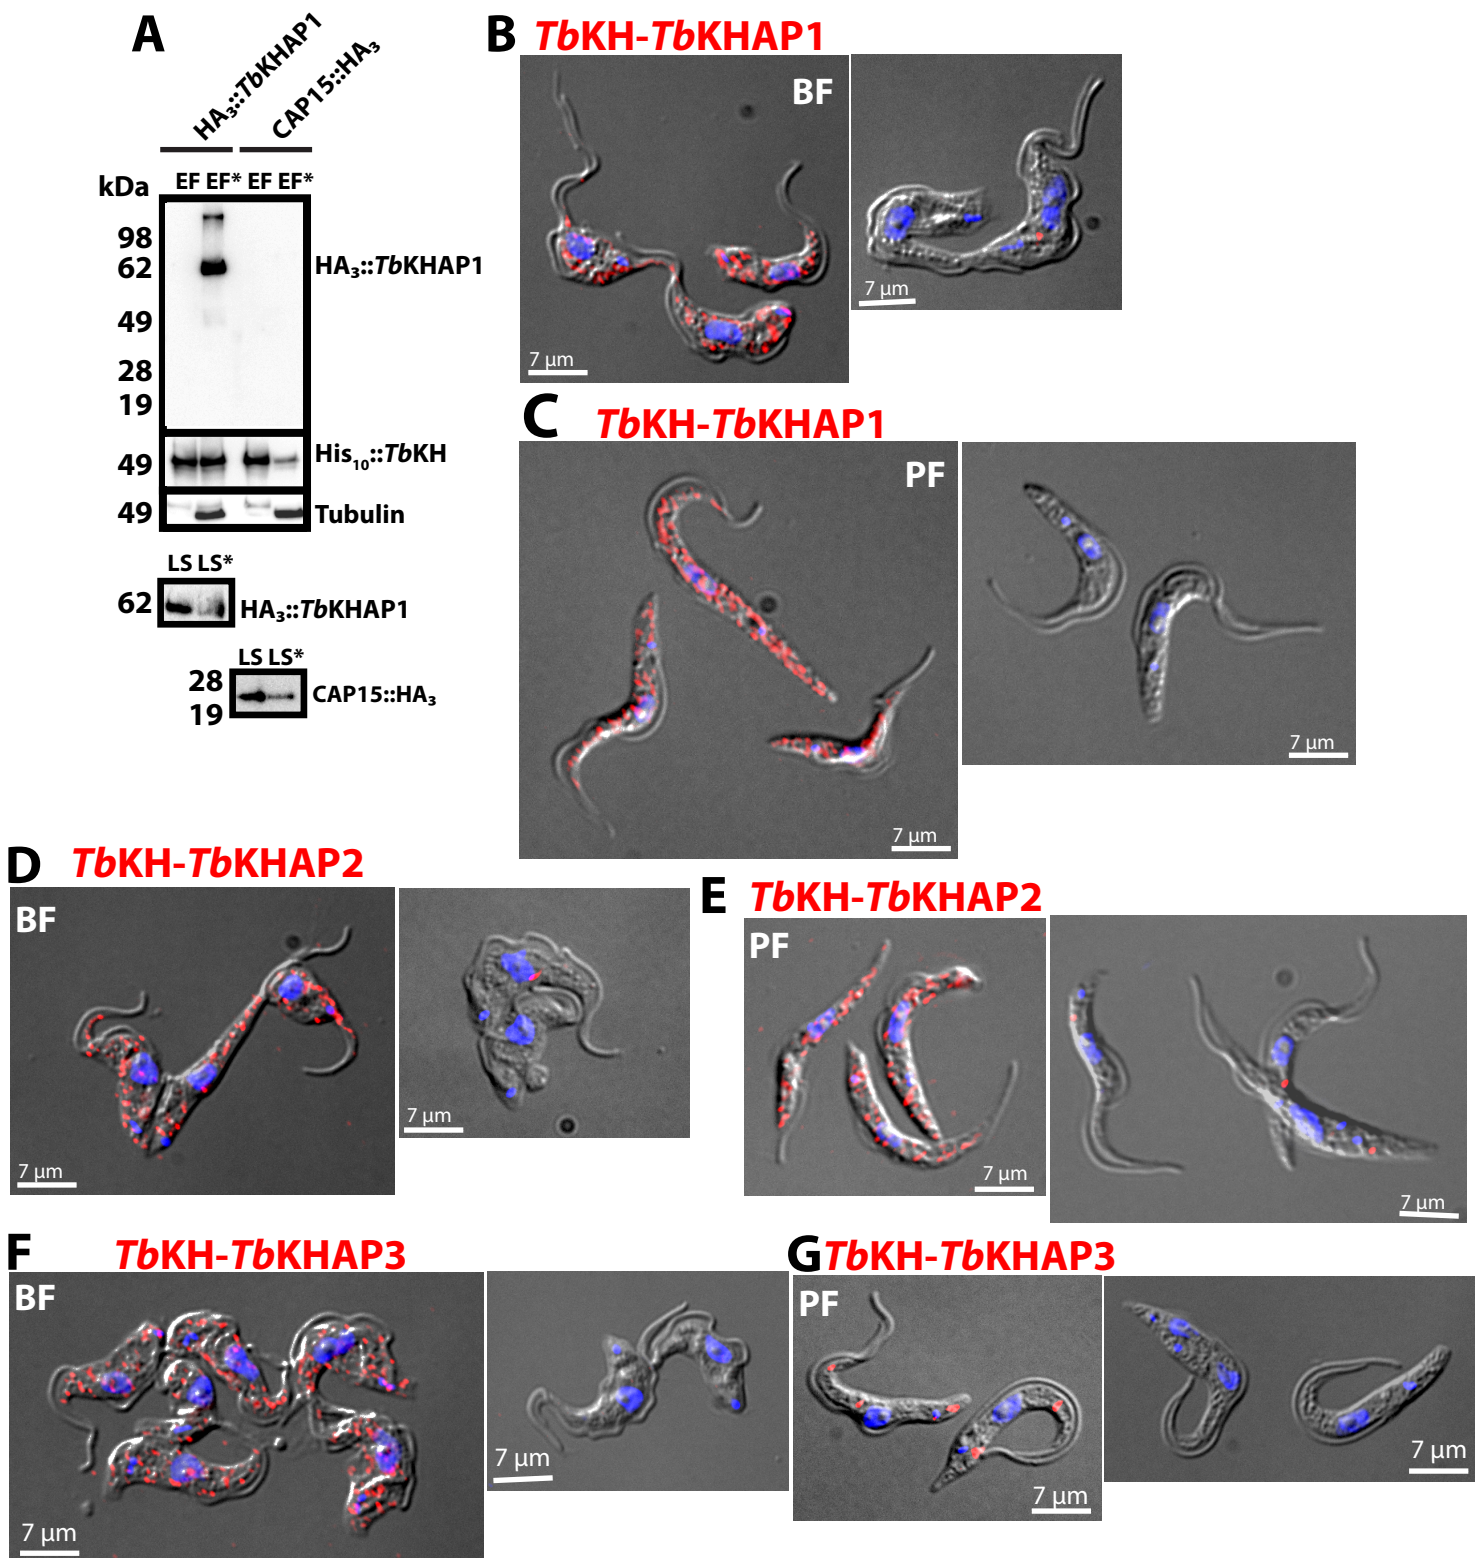



Figure 5

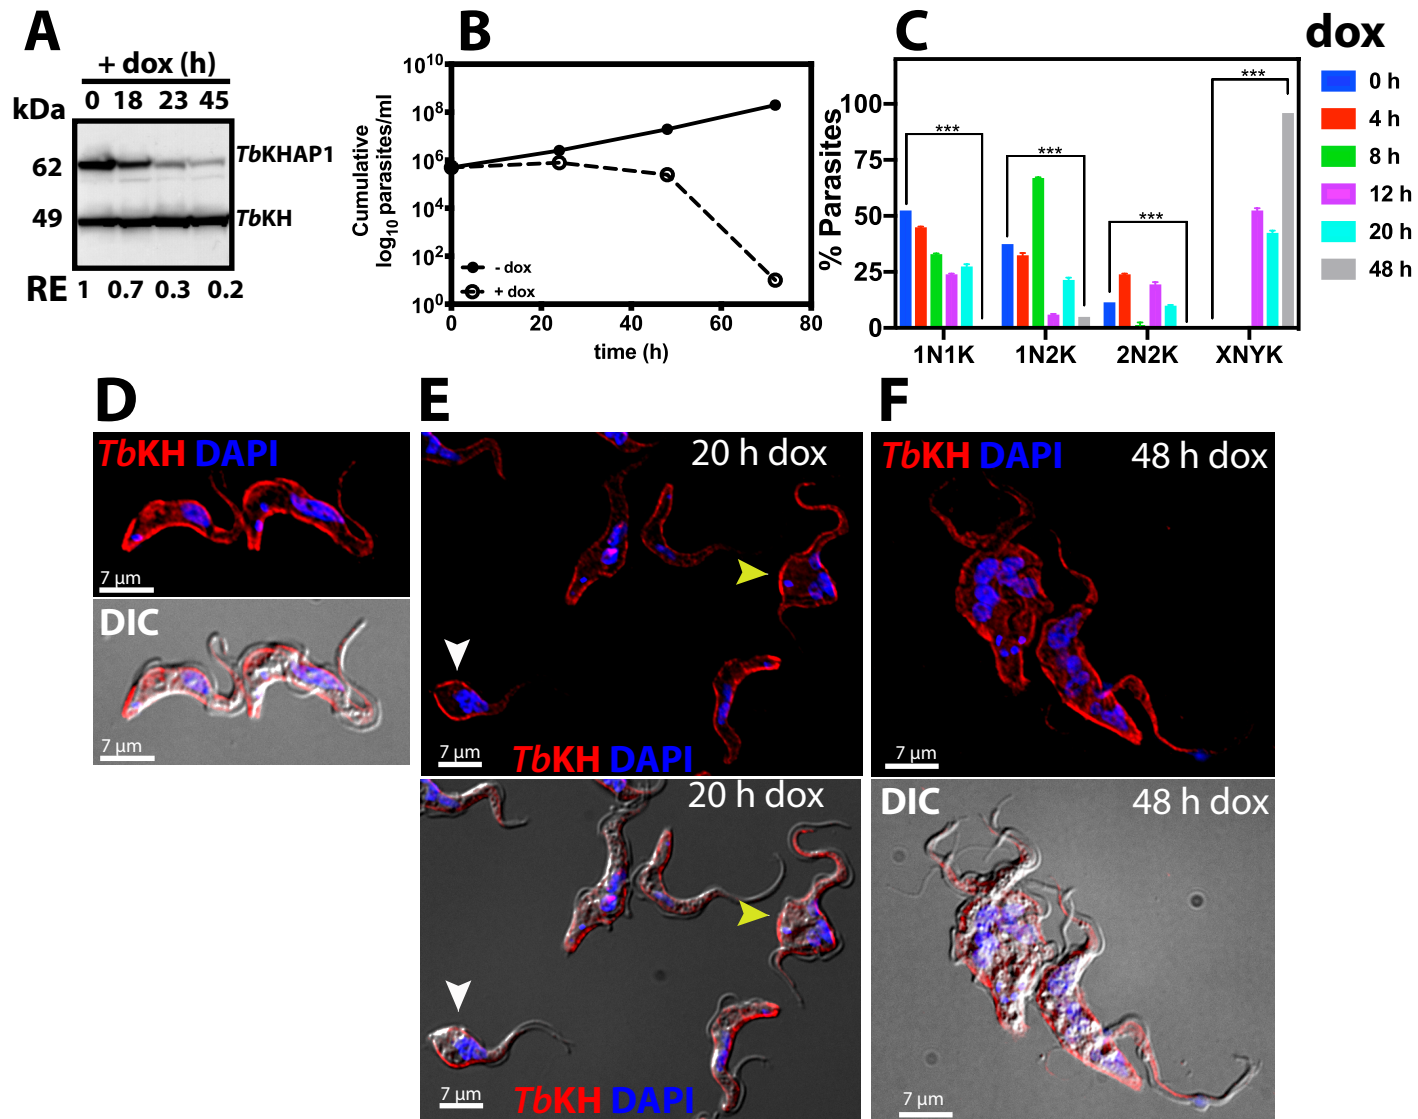

Figure 6

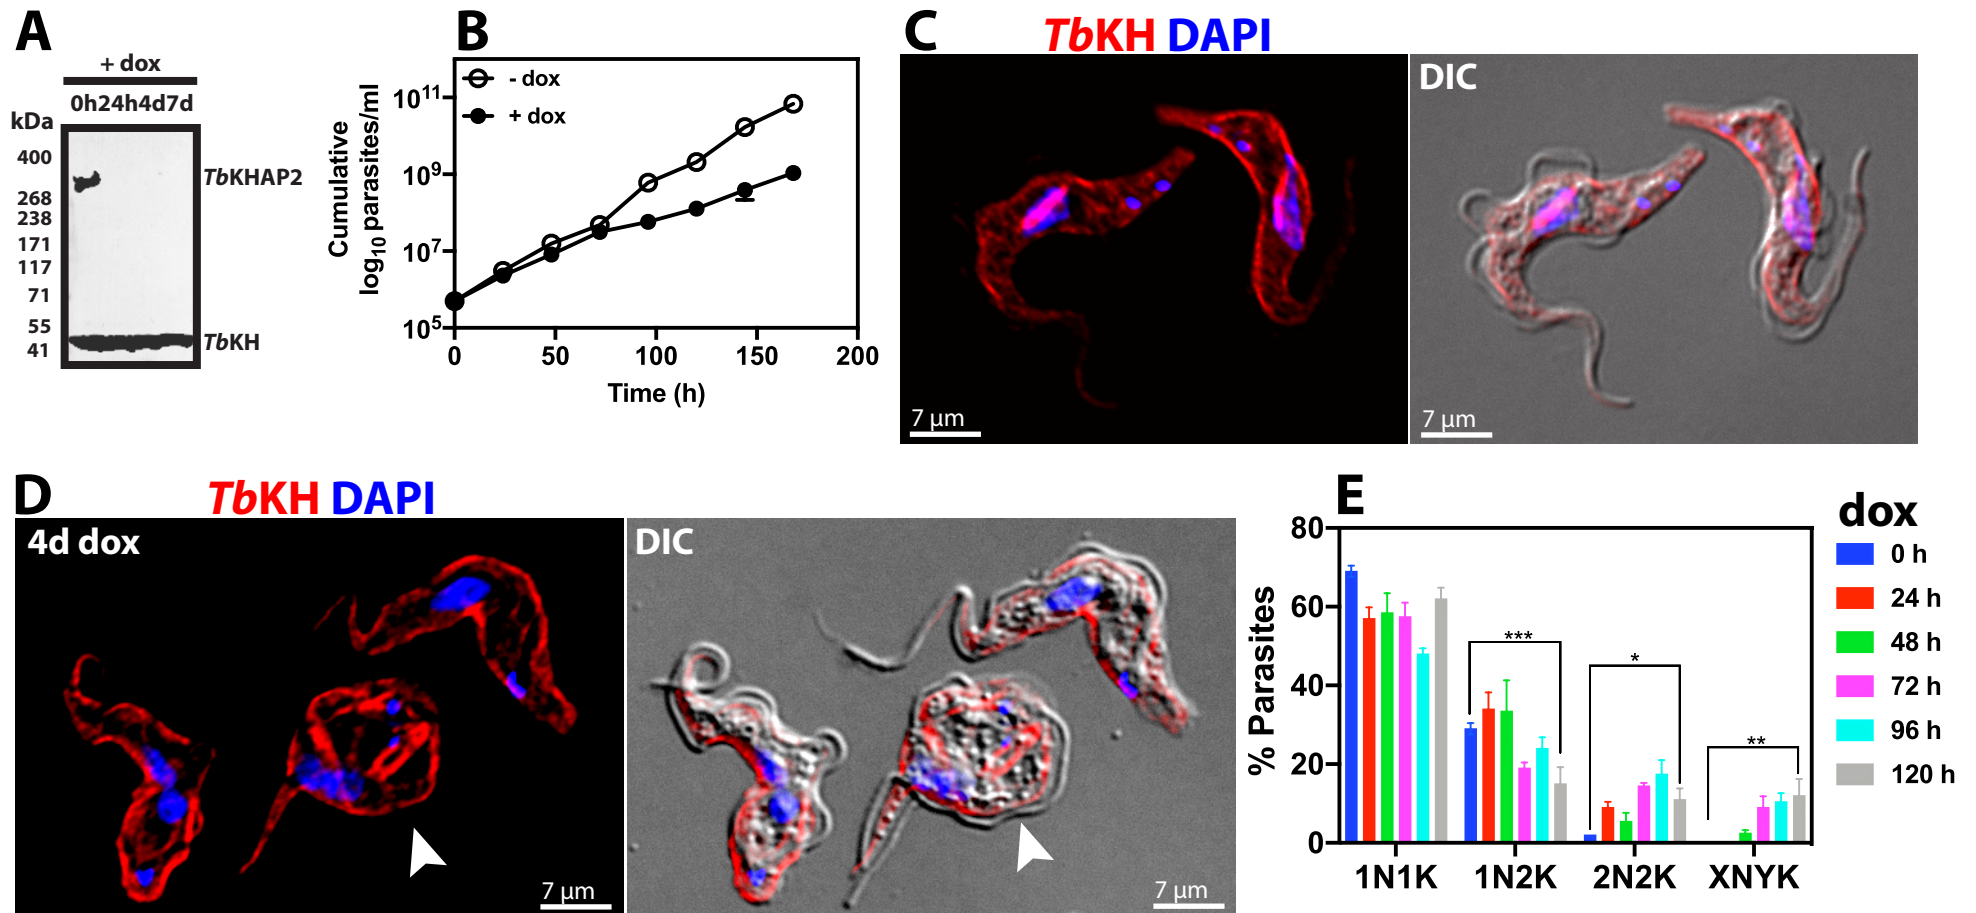

Figure 7

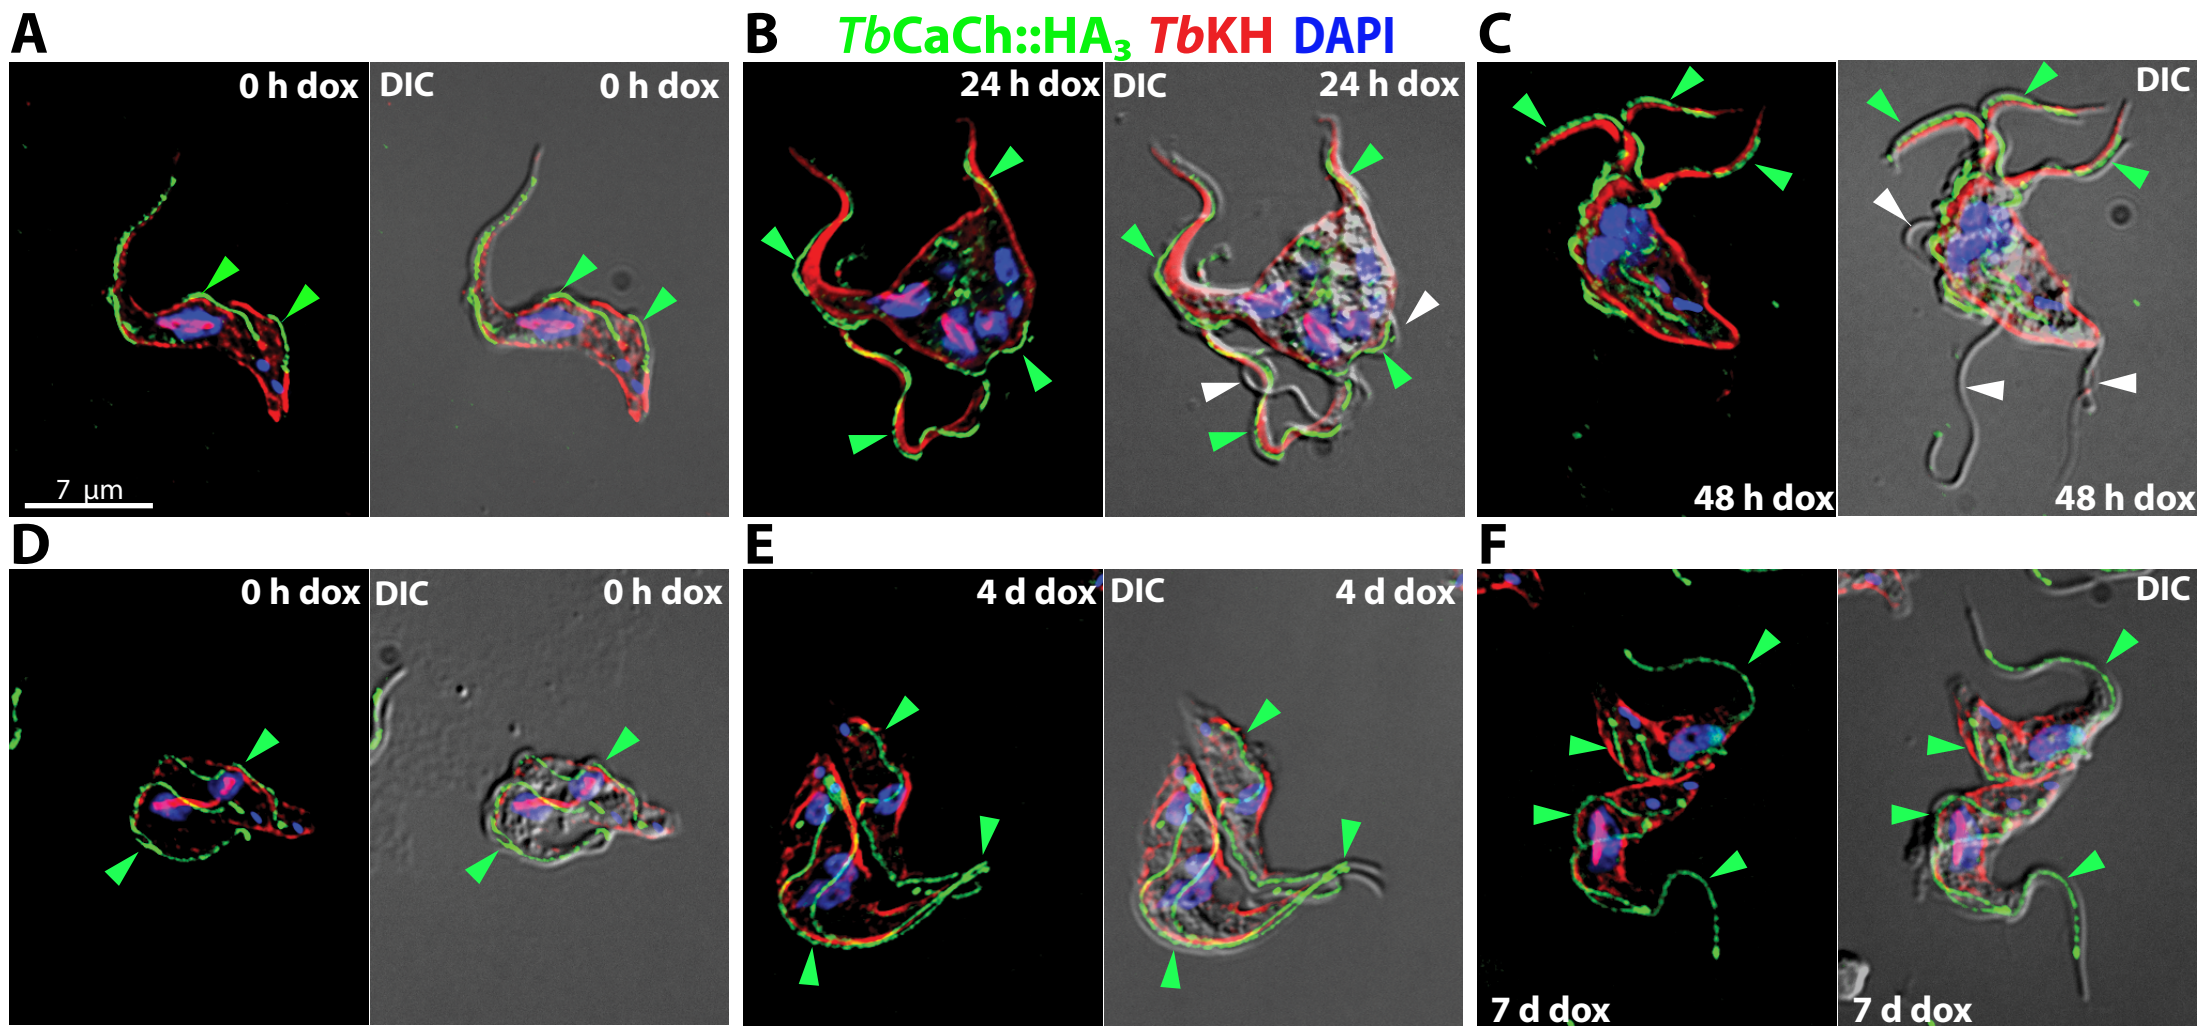

**A** *TbEVMP1* DAPI

*TbEVMP1*

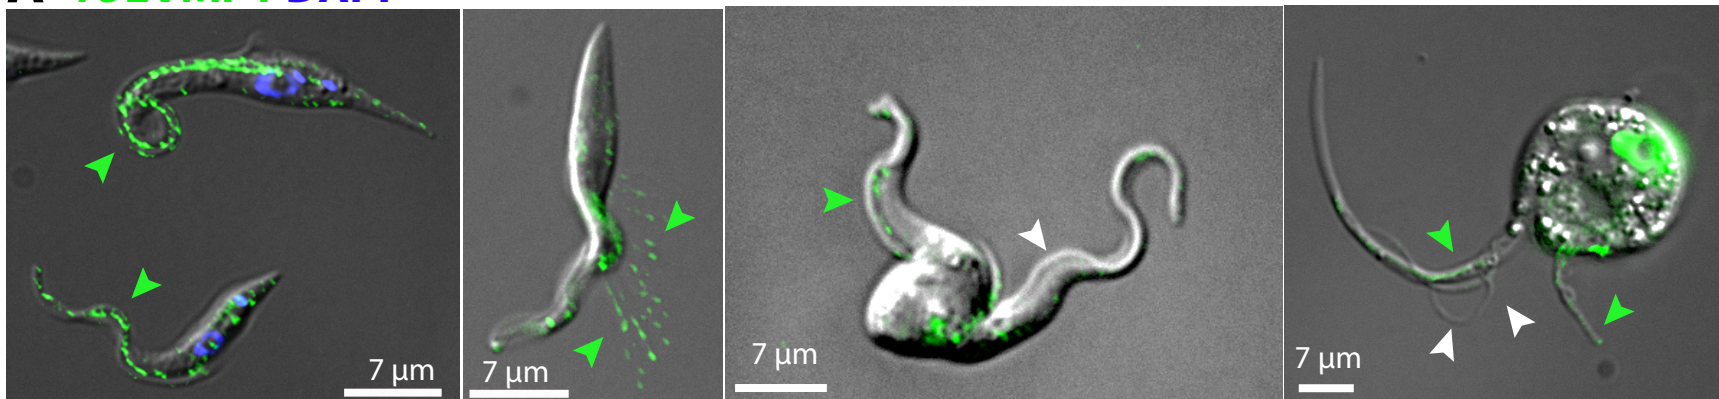

0 h RNAi

24 h RNAi

**B** *TbEVMP2*

*TbEVMP2*

*TbEVMP2*

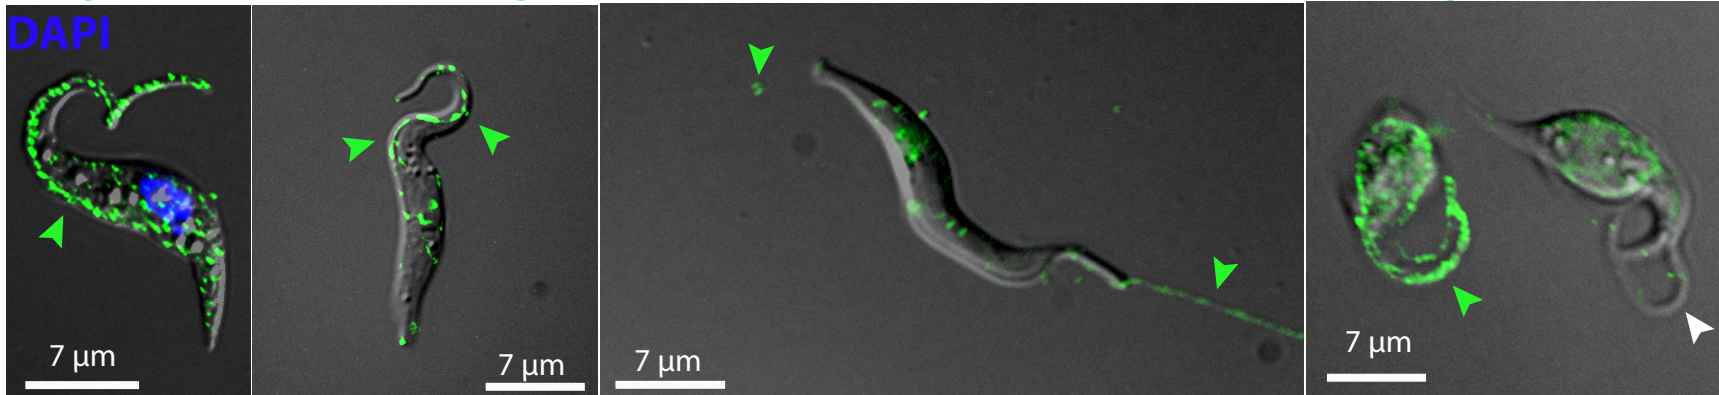

0 h RNAi

24 h RNAi

**C** *TbFLA1BP*

*TbFLA1BP*

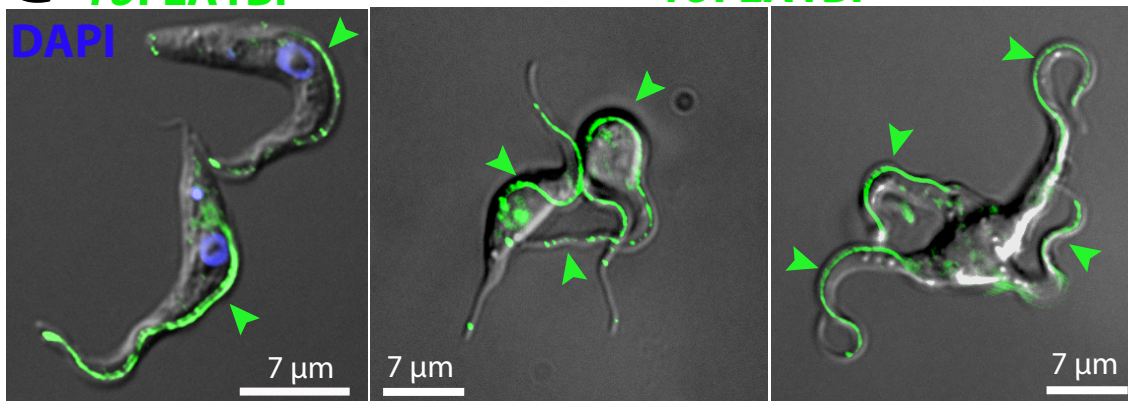

0 h RNAi

24 h RNAi

48 h RNAi
